# Supplementary material
Source: PubMed Central journal article supplement (PMC4414326)
Supplement: NIHMS680350-supplement-S1.pdf [file NIHMS680350-supplement-S1.pdf]

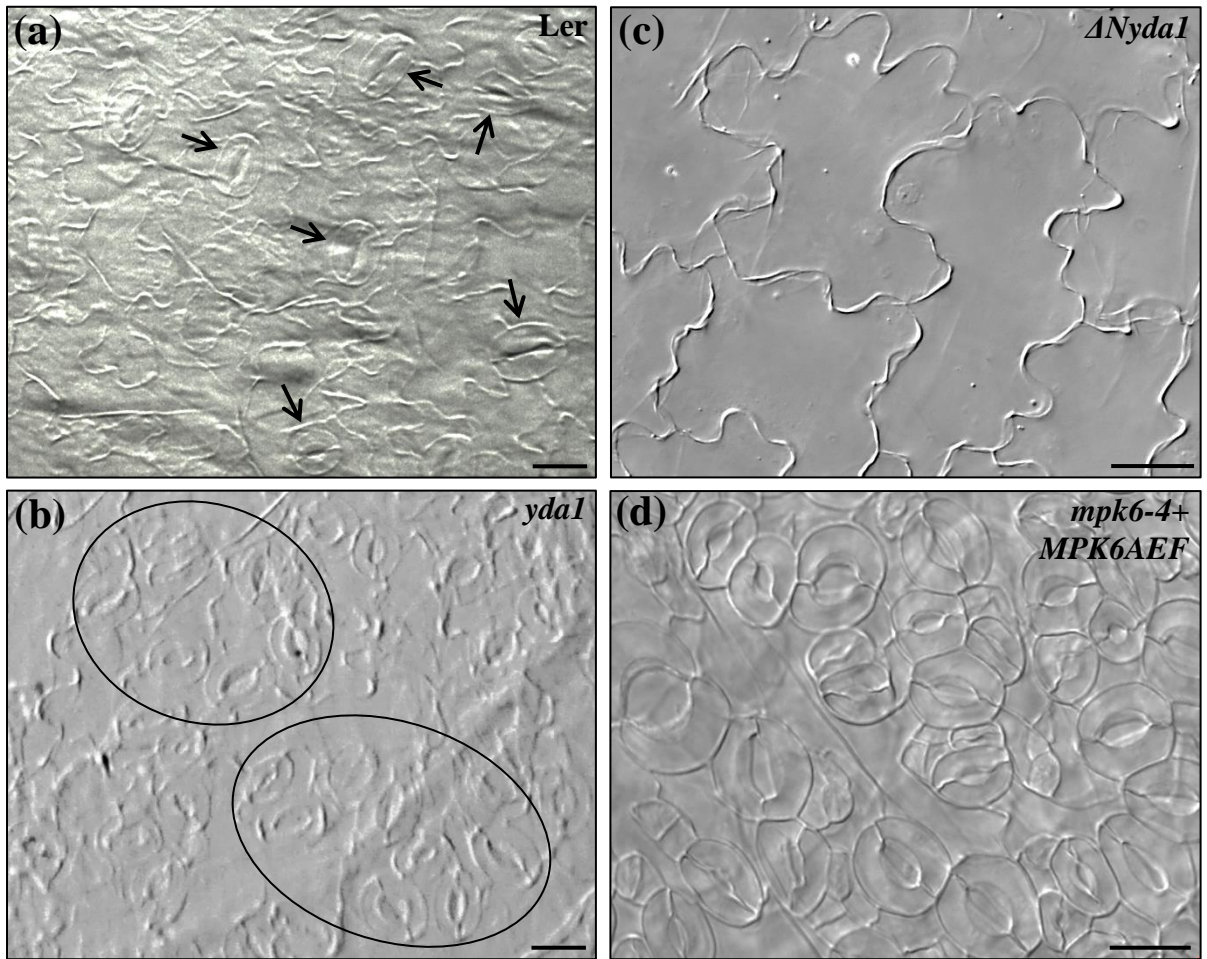

**Fig. S1** Stomatal pattern in Ler, *yda1*,  $\Delta Nyda1$  and *mpk6-4+MPK6AEF*. (a) Stomata (arrows) in Ler (wild type) formed according to one-cell spacing rule, (b) stomatal clusters (ellipses) visible in *yda1*, whereas only epidermal cells with no stomata observed in  $\Delta Nyda1$  (c). (d) Stomatal phenotype of *mpk6-4+MPK6AEF* exhibiting stomatal clusters very similar to *yda1*. Bars, 20  $\mu\text{m}$ .

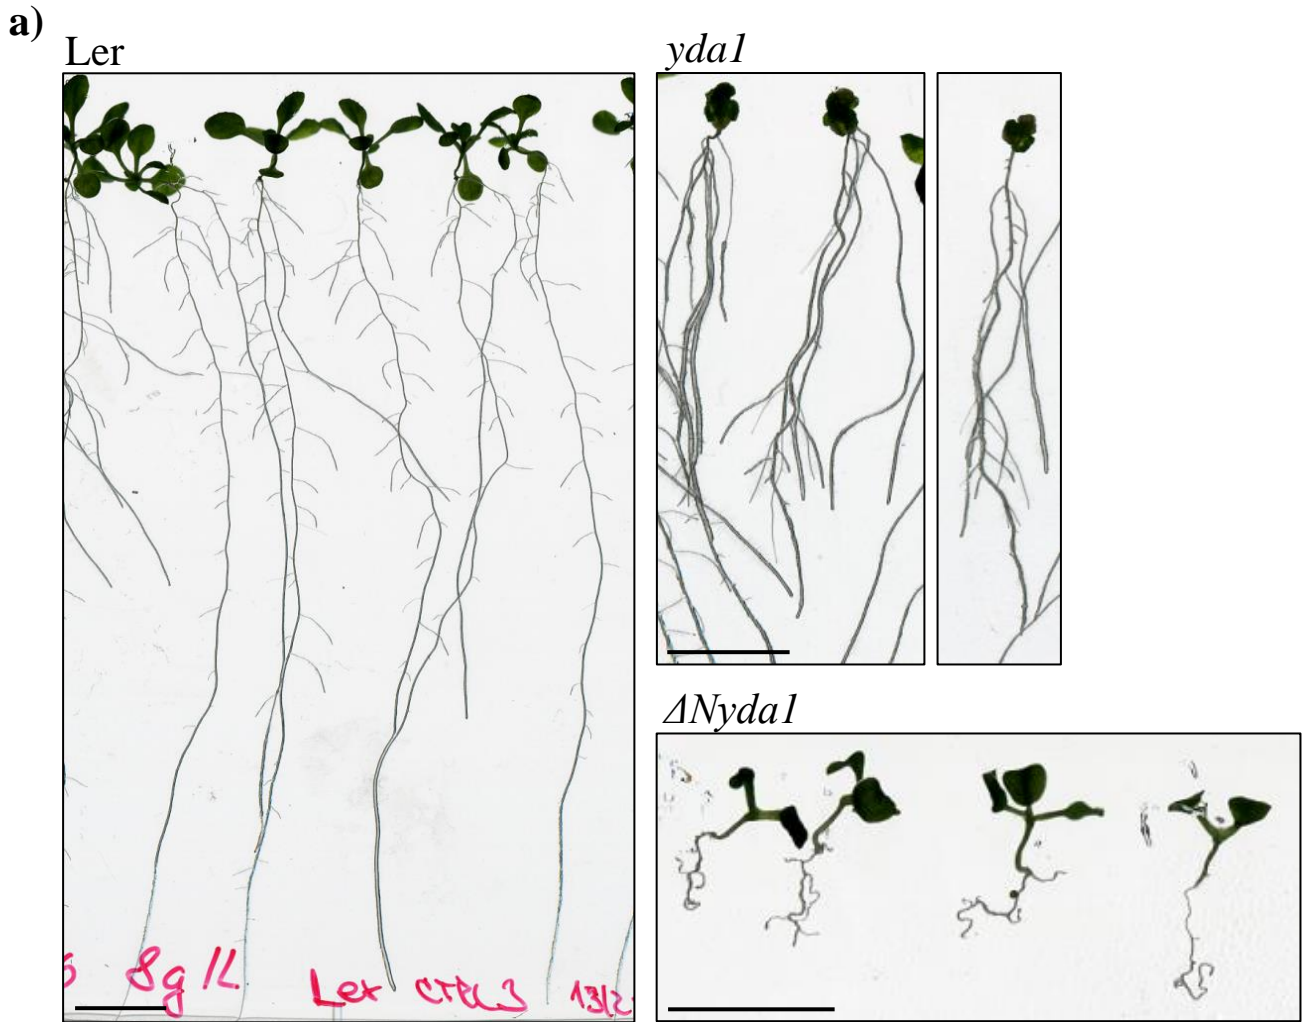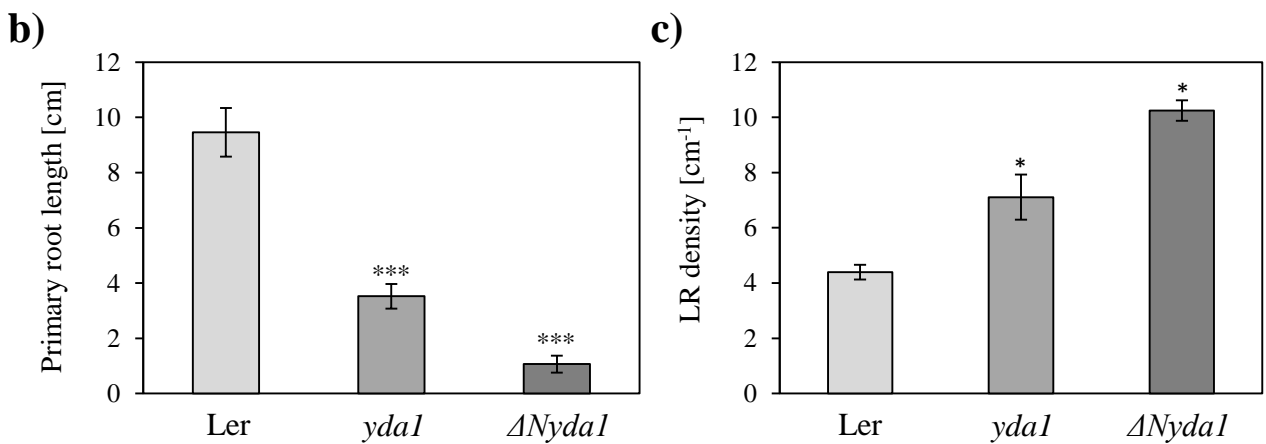

**Fig. S2** Phenotype of 14 days old plants of Ler, *yda1* and  $\Delta Nyda1$  used for IAA content analysis. (a) Representative phenotype of Ler, *yda1* and  $\Delta Nyda1$  plants. (b) Graph depicting mean ( $\pm$  S.D.) of primary root length of Ler (N=18), *yda1* (N=13) and  $\Delta Nyda1$  (N=15). (c) Graph depiction of lateral root density (number of lateral roots per 1cm of root branching zone) of Ler (N=18), *yda1* (N=13) and  $\Delta Nyda1$  (N=15). \*,  $p < 0.05$ ; \*\*\*,  $p < 0.001$ . Bar, 1cm.

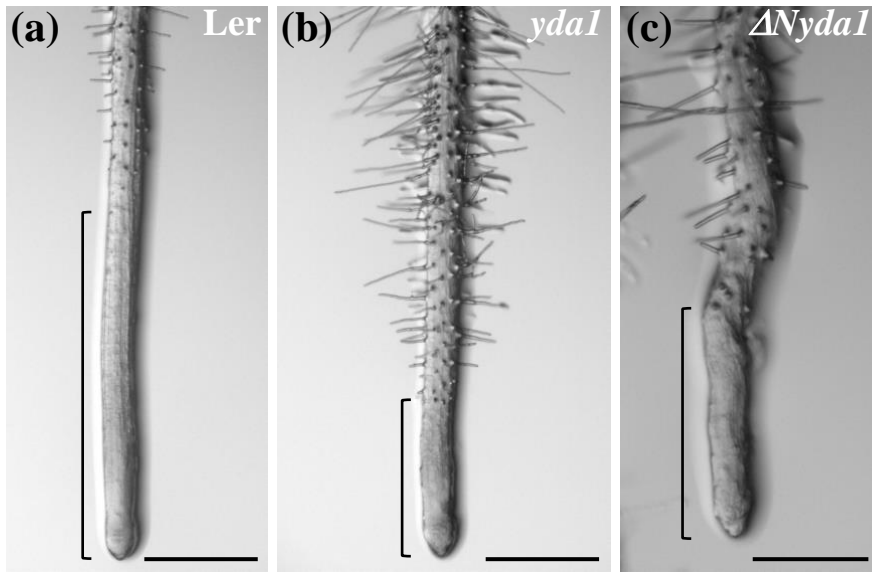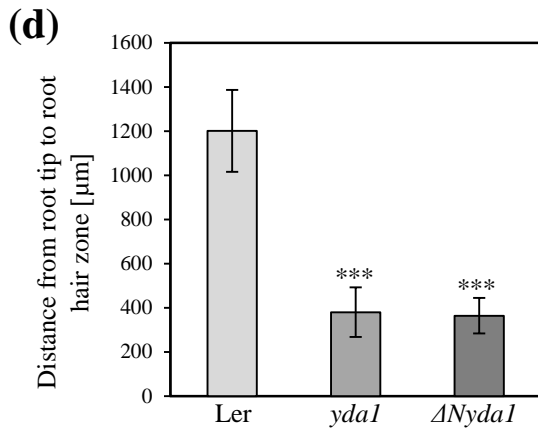

**Fig. S3** Root hair emergence with respect to root tip in Ler (a), *yda1* (b) and  $\Delta Nyda1$  (c). Note earlier root hair emergence in *yda1* (b) and  $\Delta Nyda1$  (c). Brackets roughly denote the distance between root tip and root hair appearance which was used for measurements of 8 days old plants depicted in (d) comparing distance from root tip to root hair zone among Ler (N=30), *yda1* (N=30) and  $\Delta Nyda1$  (N=30). \*\*\*,  $p < 0.001$ . Bar, (a,b) 500  $\mu\text{m}$ ; (c) 200  $\mu\text{m}$ .

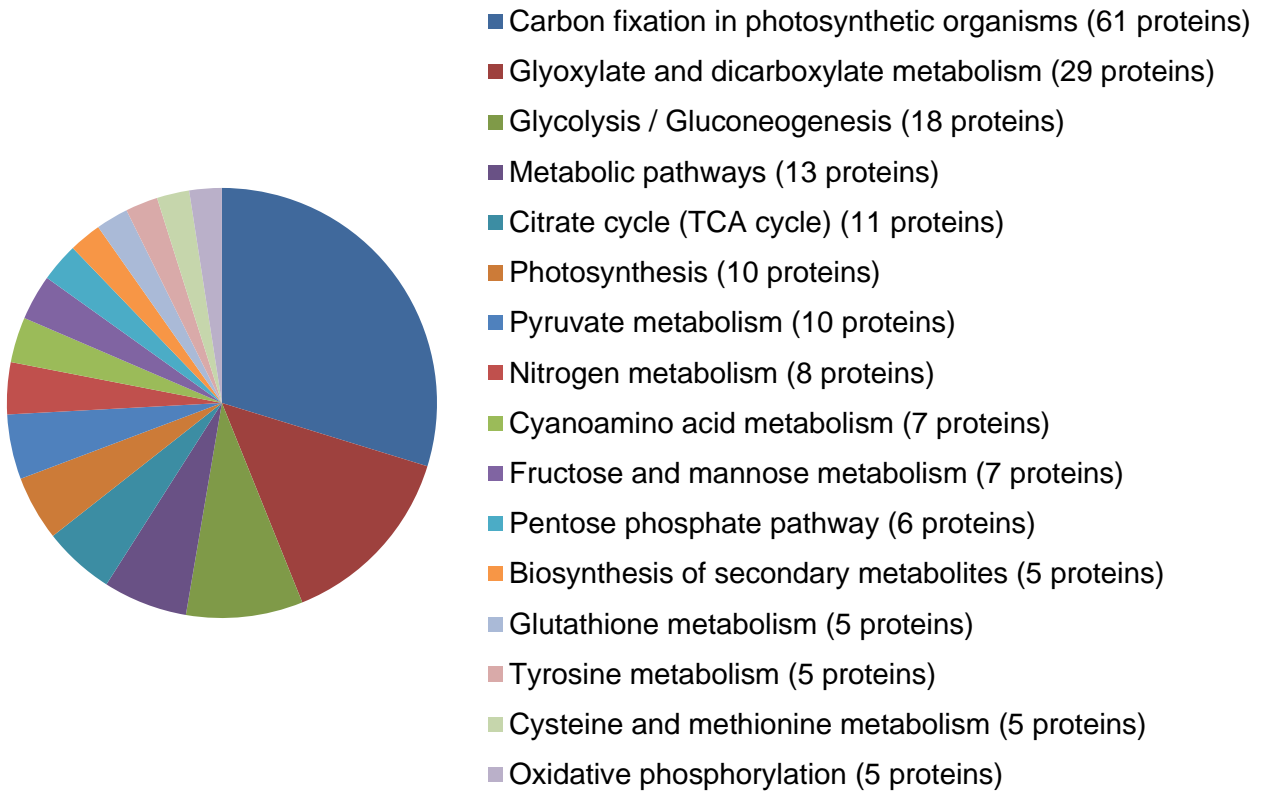

**Fig. S4** Classification of differentially regulated proteins detected by comparative proteomic analysis of *Arabidopsis yda1* mutant and wild type (Ler) according to KEGG annotations.

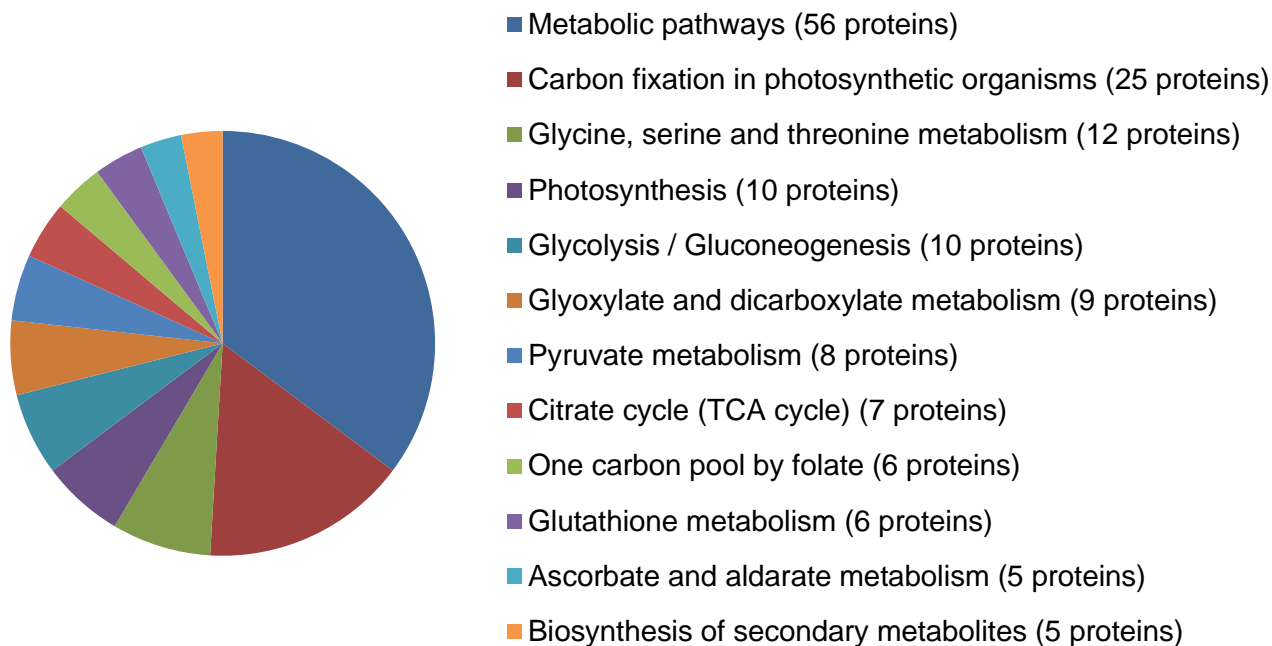

**Fig. S5.** Classification of differentially regulated proteins detected by comparative proteomic analysis of *Arabidopsis*  $\Delta Nyda1$  mutant and wild type (Ler) according to KEGG annotations.

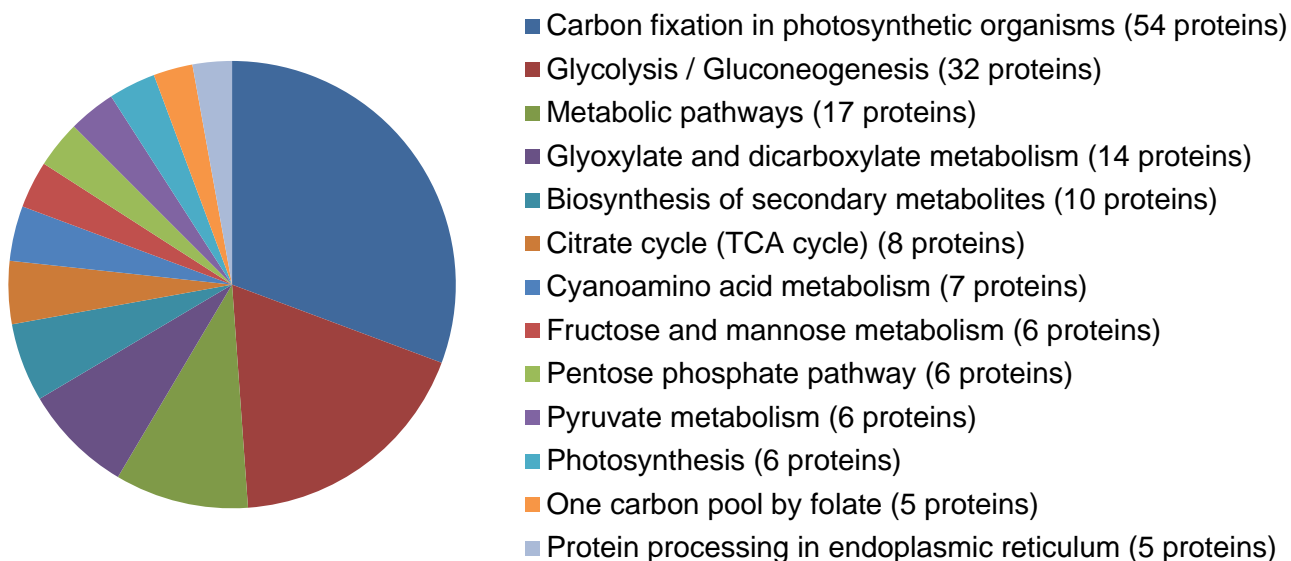

**Fig. S6** Classification of differentially regulated proteins detected by comparative proteomic analysis of *Arabidopsis yda1* and  $\Delta Nyda1$  mutants according to KEGG annotations.



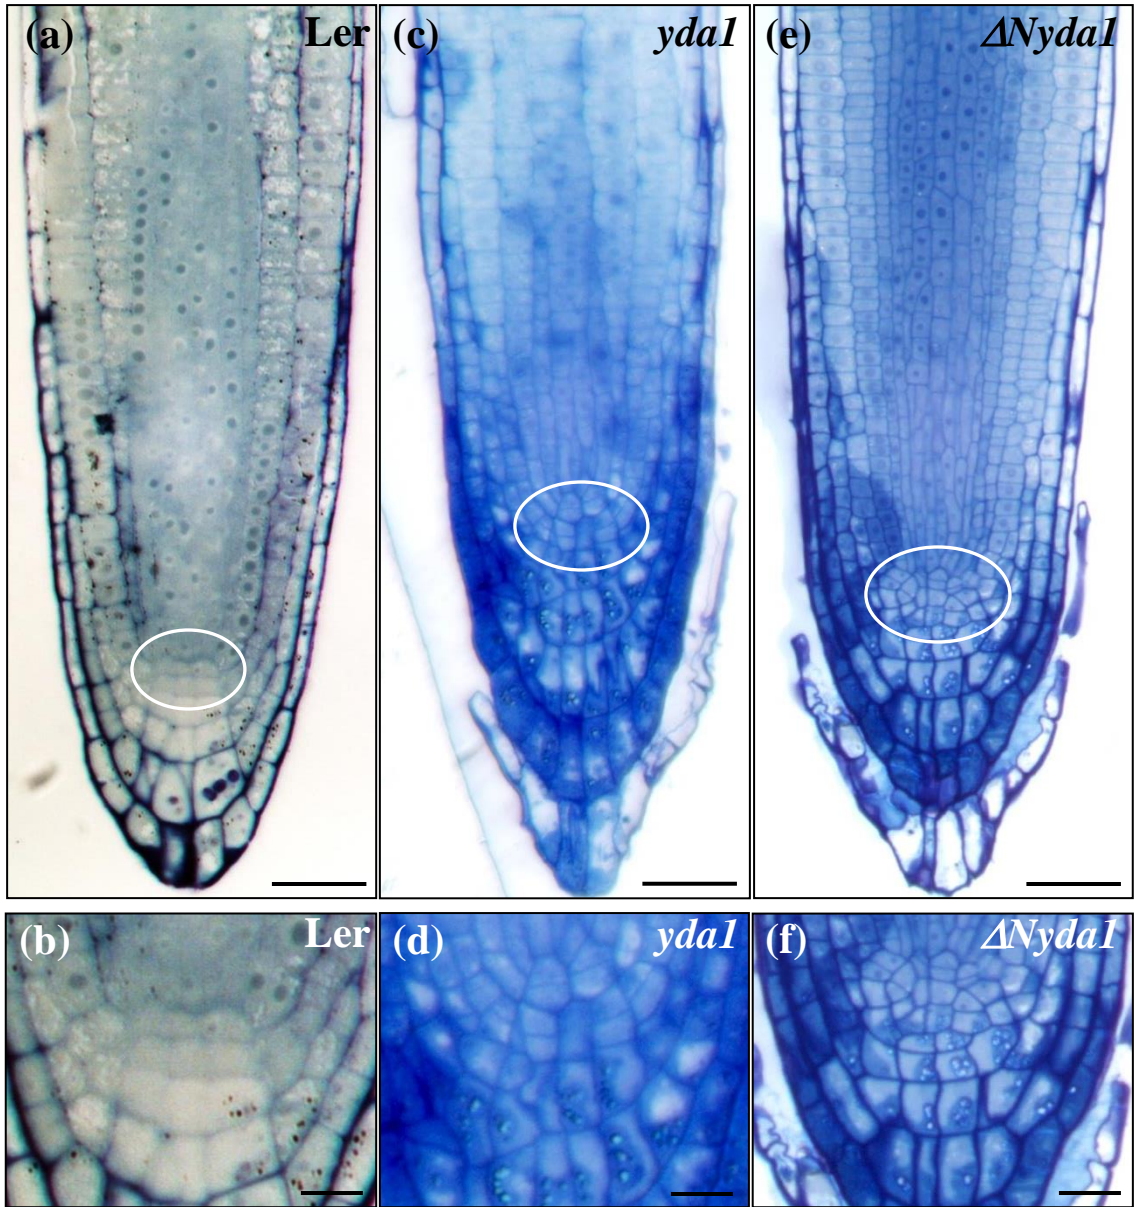

**Fig. S7** Semithin sections stained with toluidine blue showing root tips of wild type Ler (a, b), *yda1* (c, d) and  $\Delta Nyda1$  (e, f) mutant roots. Note, that regular alignments of cell files are disturbed in mutant roots showing disoriented and ectopic cell divisions, especially in the area of stem cell niche (circles in a, c, e and details in b, d, f). Bars, (a,c,e) 30  $\mu$ m, (b,d,f) 10 $\mu$ m.

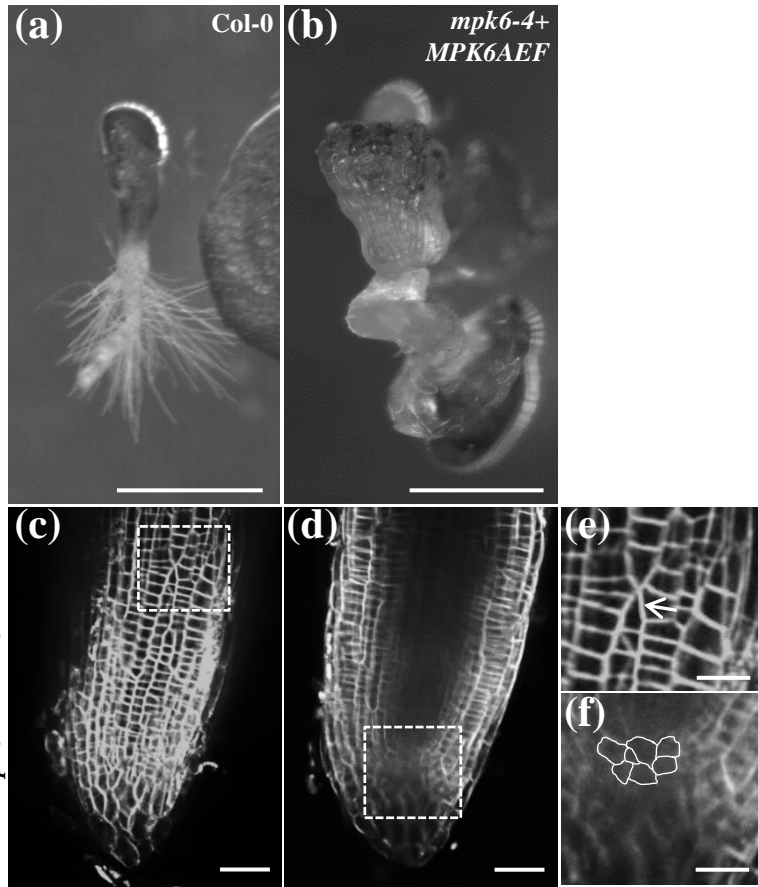

**Fig. S8** Phenotype of 4 days old *mpk6-4+MPK6AEF* seedlings. (a, b) Development of primary roots in Col-0 (a) and *mpk6-4+MPK6AEF* (b). *mpk6-4+MPK6AEF* show thick and short primary roots in comparison to Col-0 plants. (c-f) Root cell architecture in *mpk6-4+MPK6AEF* seedlings stained with FM4-64 styryl dye. Surface (c, e) and central (d, f) optical sections of *mpk6-4+MPK6AEF* primary roots. Boxed area (c) and higher magnification (e) show disturbances in the cell division planes. Oblique cell division planes are marked with arrow (e). Root tips of *mpk6-4+MPK6AEF* showed defect organization of the stem cell niche (d, f). Bars, (a) 1 mm; (b) 500 μm; (c, d) 50 μm and (e, f) 20 μm.



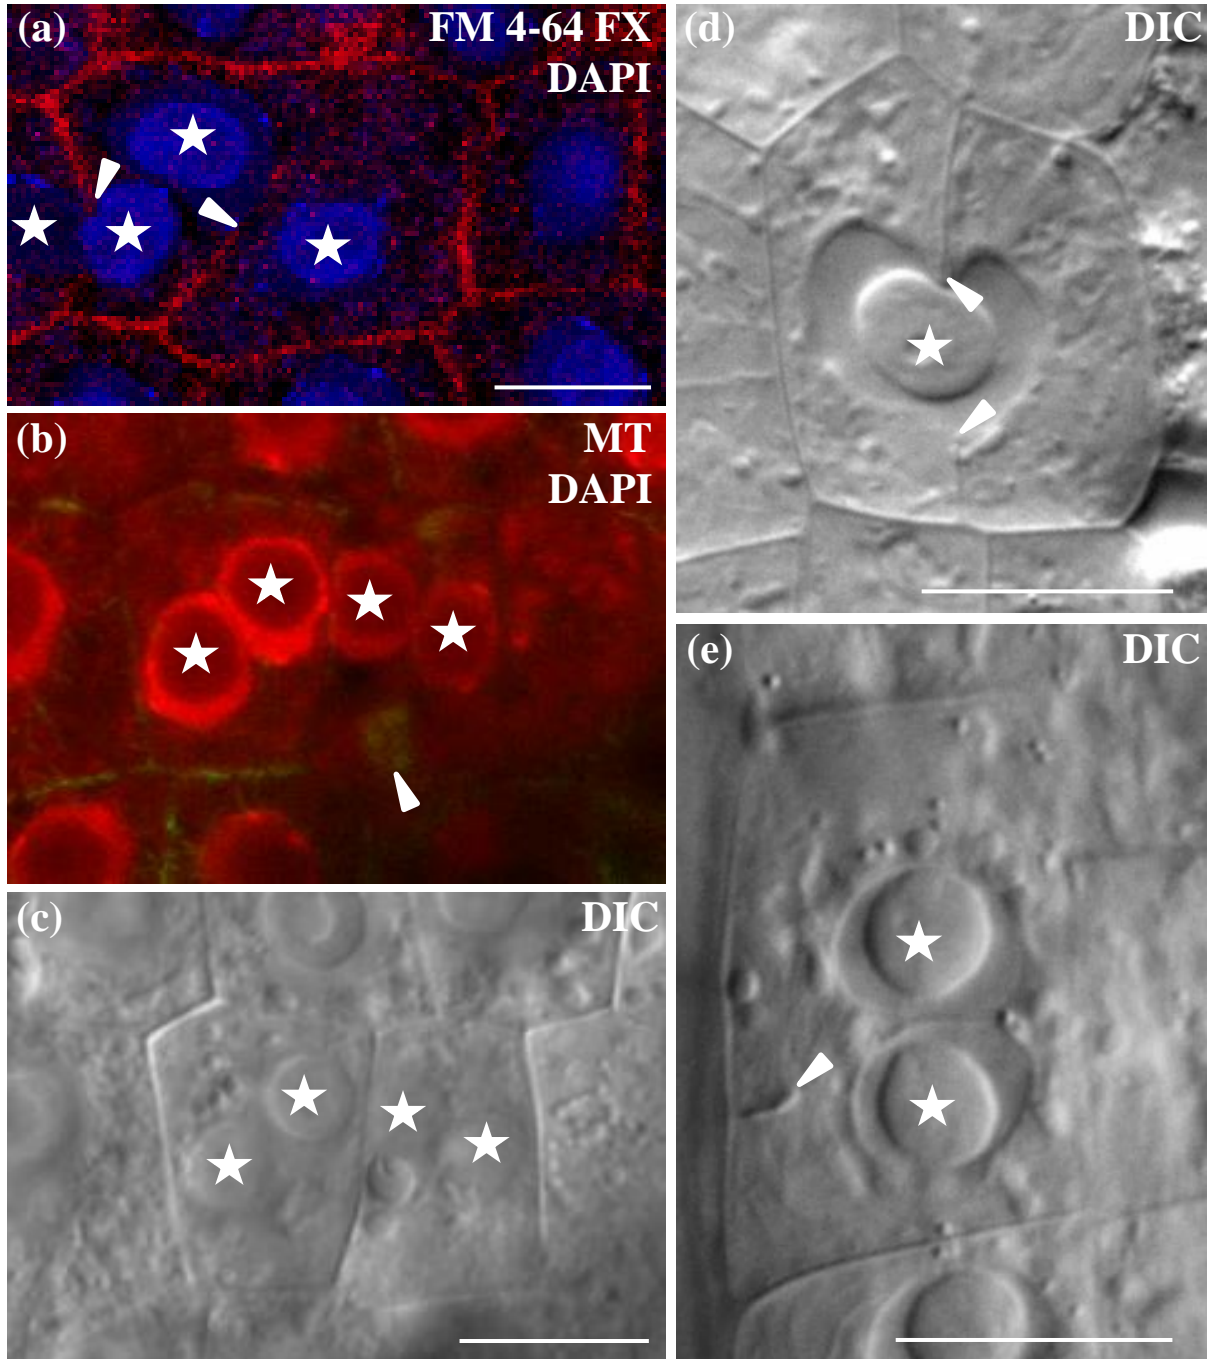

**Fig. S9** Identification of multinucleate and binucleate cells in *yda1* main root epidermis after staining of plasma membrane with fixable FM 4-64 FX styryl dye and DNA counterstaining with DAPI (a). Asterisks mark the nuclei and arrowheads show the incomplete cell walls. Two adjacent binucleate main root epidermal cells of *yda1* immunostained against tubulin (MT, green) and counterstained for DNA (DAPI, red) as visualized by CLSM (b) and DIC (c). One of them has residual phragmoplast (arrowhead) while in none is a cell plate discernible. Nuclei are marked with asterisks. (d, e) Visualization of incomplete cytokineses in living lateral root epidermal cells of *yda1* with DIC optics. In (d) a single nucleus (asterisk) is protruding between two compartments defined by incomplete cell wall stubs (arrowheads). In (e) arrowhead points to incomplete cell wall stub in binucleate cell (asterisks mark nuclei). Bars, 10  $\mu\text{m}$ .

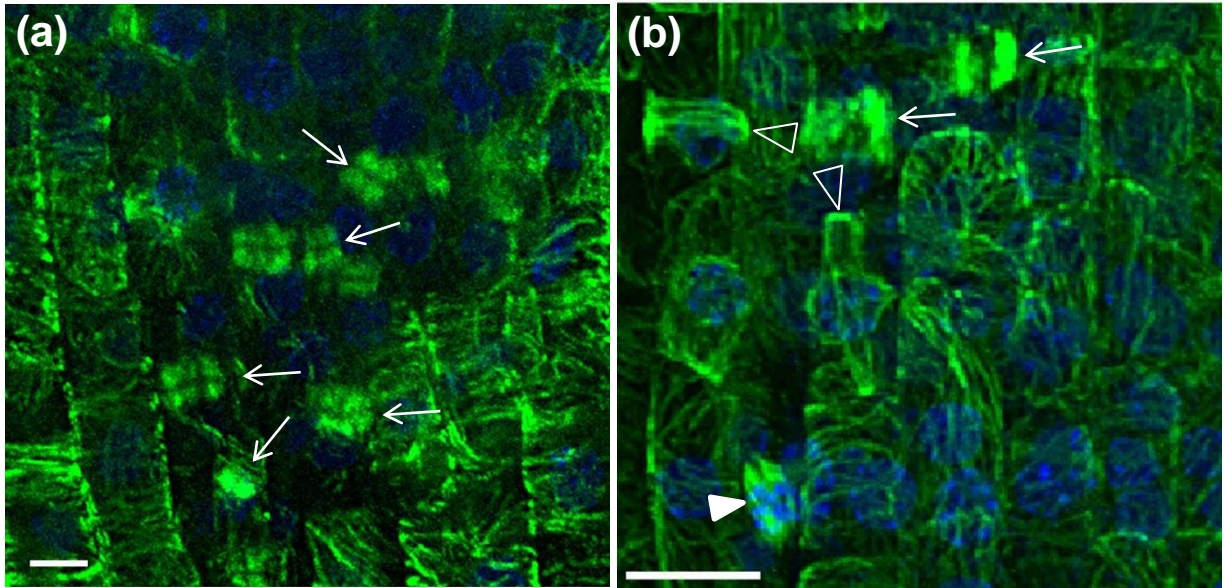

**Fig. S10** Overview of mitotic and cytokinetic microtubule arrays of *yda1* primary root wholemounts immunostained for tubulin (green) and counterstained with the DNA stain DAPI (blue). (a, b) Clustering of mitotic stages in primary roots of *yda1* mutant as shown by the occurrence of multiple phragmoplasts (arrows in a and b) together with preprophase bands (PPBs, outlined arrowheads in b) and a mitotic spindle (full arrowhead in b). Bars, 10  $\mu\text{m}$ .

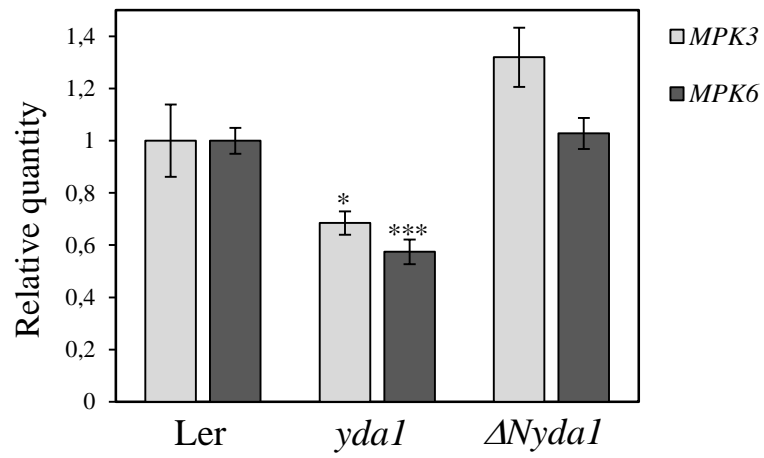

**Fig. S11** Quantitative analysis of transcript levels of *MPK3* and *MPK6* genes in extracts from Ler, *yda1* and  $\Delta Nyda1$  plants. Graph depiction (mean  $\pm$  S.D.) of *MPK3* and *MPK6* transcript levels quantified by qPCR and normalized against *EF1 $\alpha$*  transcripts. \*,  $p < 0.05$ ; \*\*\*,  $p < 0.001$ .

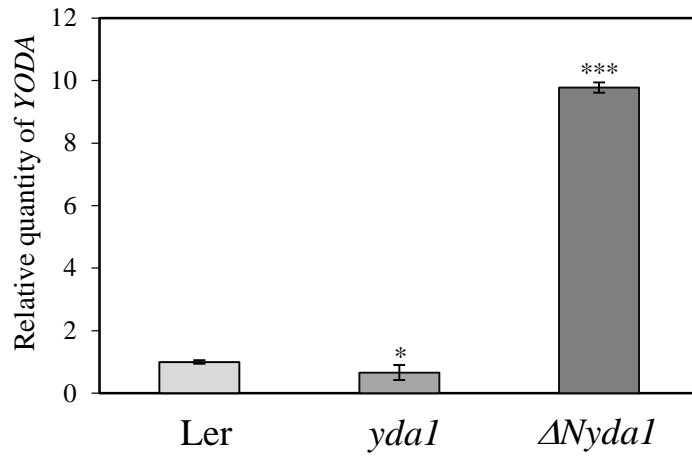

**Fig. S12** Quantitative analysis of transcript level of *YODA* gene in extracts from 14 days old plants of Ler, *yda1* and  $\Delta Nyda1$ . Graph depiction (mean  $\pm$  S.D.) of *YODA* transcript level quantified by qPCR and normalized against *EF1 $\alpha$*  transcripts. qPCR was performed with three independent biological samples in technical triplicates. \*,  $p < 0.05$ ; \*\*\*,  $p < 0.001$ .

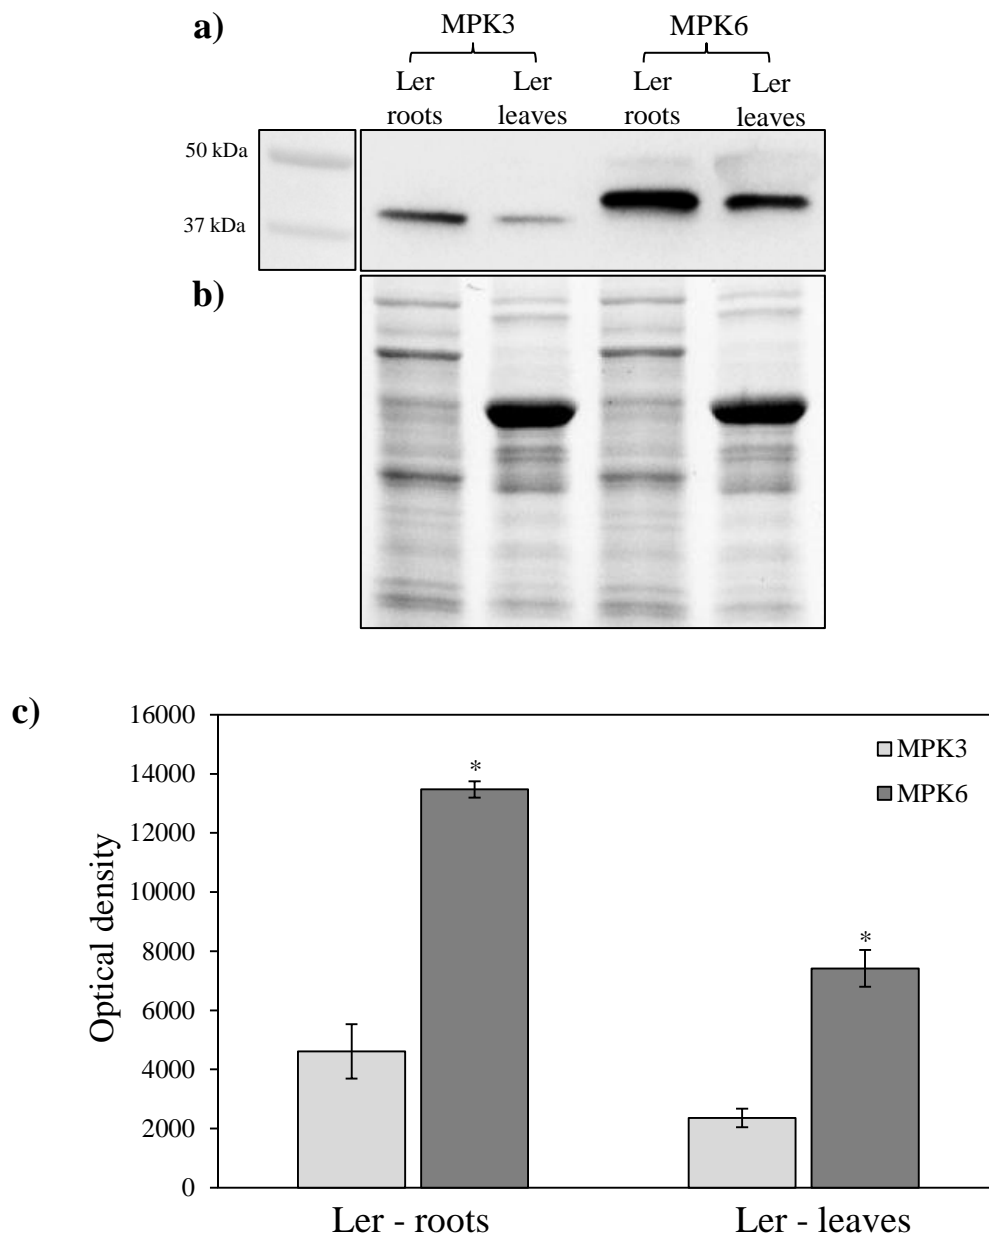

**Fig. S13** Quantitative analysis of MPK3 and MPK6 protein level of 14 days old Ler plants. (a) Representative western blot from Ler extract probed with antibodies against MPK3 and MPK6 with respective loading control by using of stain-free gel (b). (c) Bar chart represented band optical densities (mean  $\pm$  S.D.; averaged from 3 biological repeats) from three independent western blots. \*,  $p < 0.05$ .

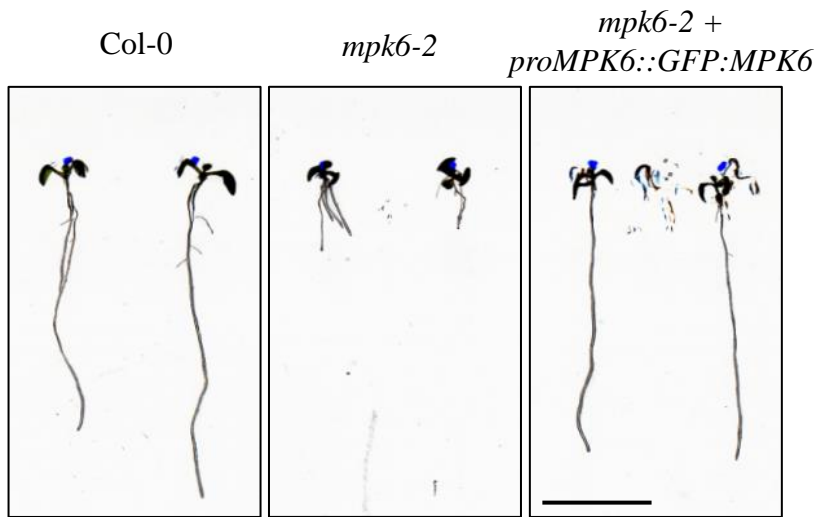

**Fig. S14** Phenotypes of Col-0, *mpk6-2* mutant and *mpk6-2* mutant rescued with *proMPK6::GFP:MPK6* construct. Arrested development of primary root in *mpk6-2* mutant was rescued by expression of GFP-tagged MPK6 protein driven by its own promoter. All seedlings were 5 days old. Bar, 1 cm.



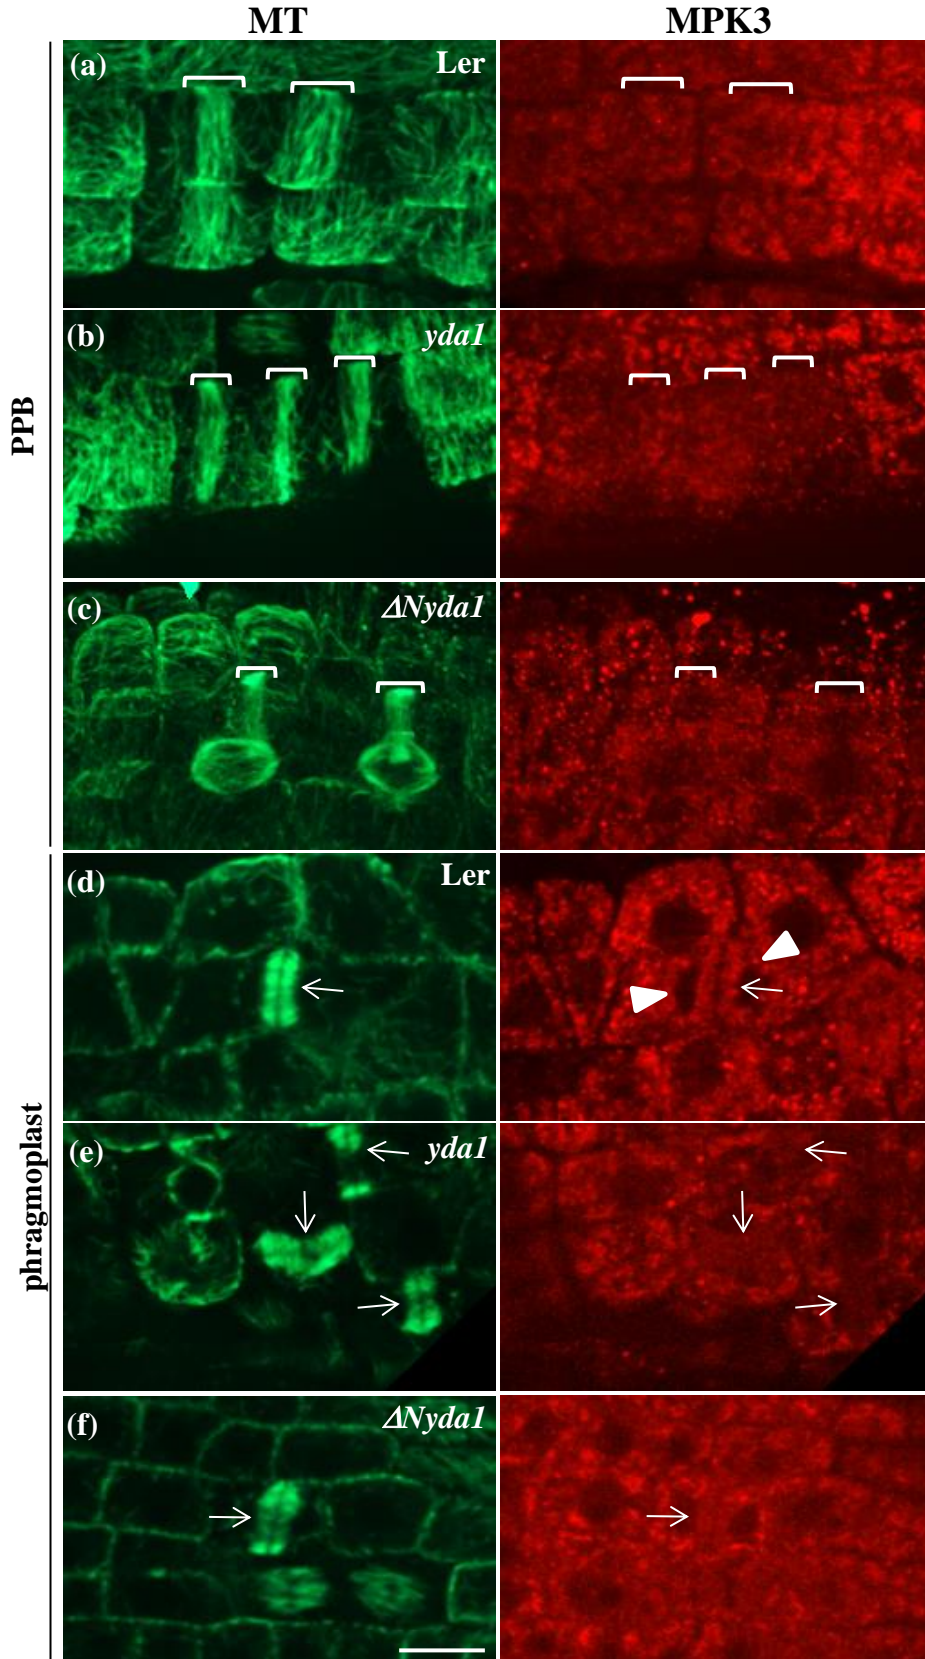

**Fig. S15** Immunofluorescent colocalization of MPK3 and microtubules in preprophase bands (PPBs) and phragmoplasts of Ler, *yda1* and  $\Delta Nyda1$  cells. (a-c) PPBs (brackets in both panels) are devoid of MPK3 immunofluorescence in all three cases. (d) Accumulation of MPK3 signal within a phragmoplast of a Ler cytokinetic cell (arrows in both panels) and in the vicinity of the nuclei (arrowheads in MPK3 panel). (e) Faint enrichment of MPK3 localization on phragmoplast structure (arrows in both panels) in *yda1* cytokinetic cell. (f) Weak MPK3 labeling of the phragmoplast in epidermal cytokinetic cells of  $\Delta Nyda1$  (arrow in both panels). Bars, 10 $\mu$ m.

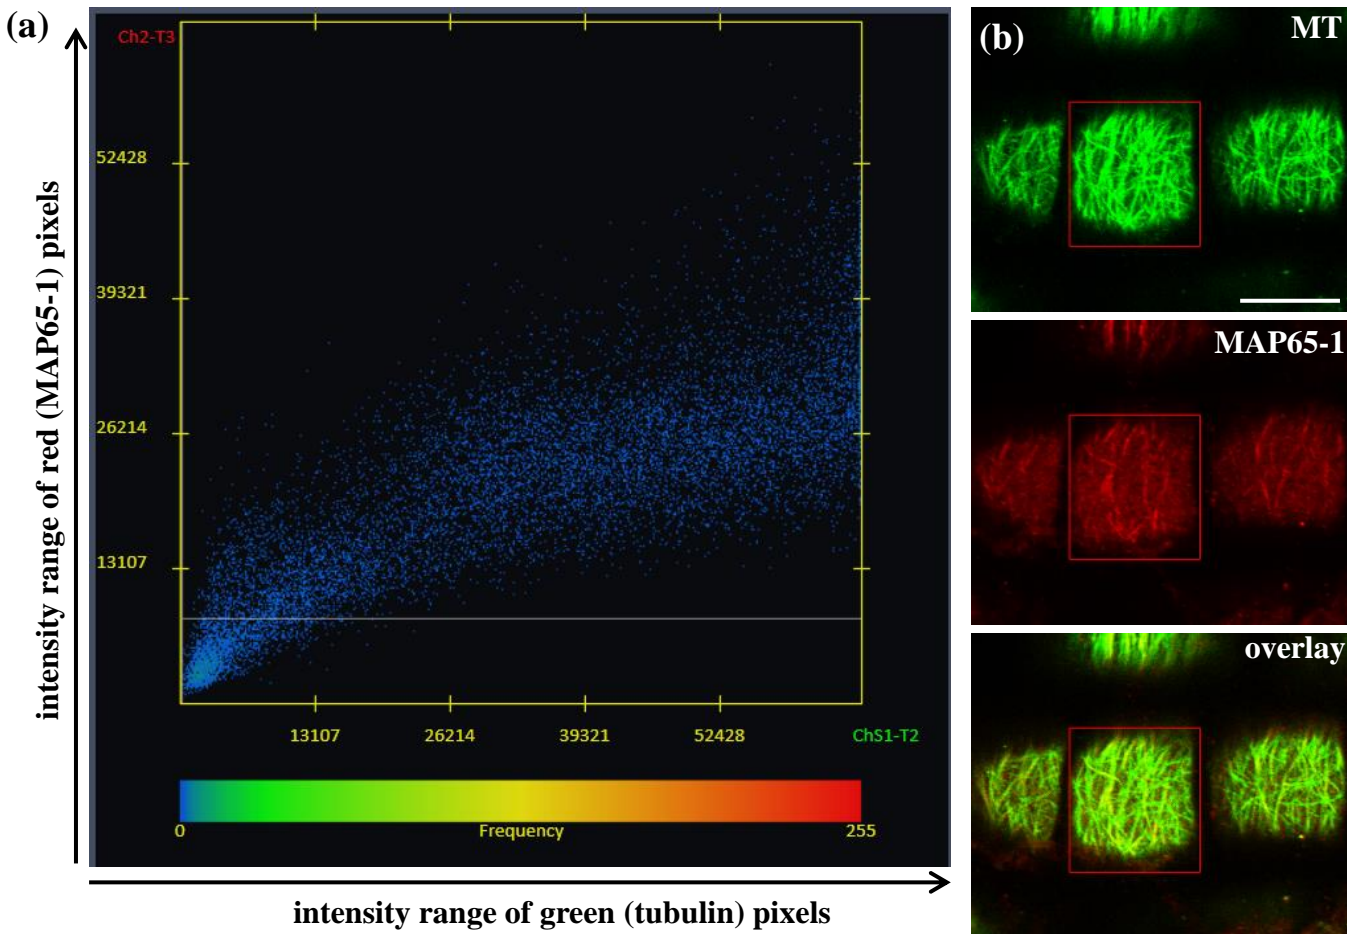

**Fig. S16** Scatter plot (a) demonstrating colocalization between cortical microtubules and MAP65-1 in a root epidermal cell of Ler outlined in (b). Horizontal axis represents green channel (tubulin) and vertical axis represents red channel (MAP65-1). Crossed hairline (a) corresponds to threshold setting according to Costes *et al.*, 2004 as explained in Materials and Methods section. For red channel, threshold values coincided with y-axis so a hairline is not visible. Therefore colocalization occurs above horizontal hairline and right to the y-axis. Bar, 10  $\mu$ m.

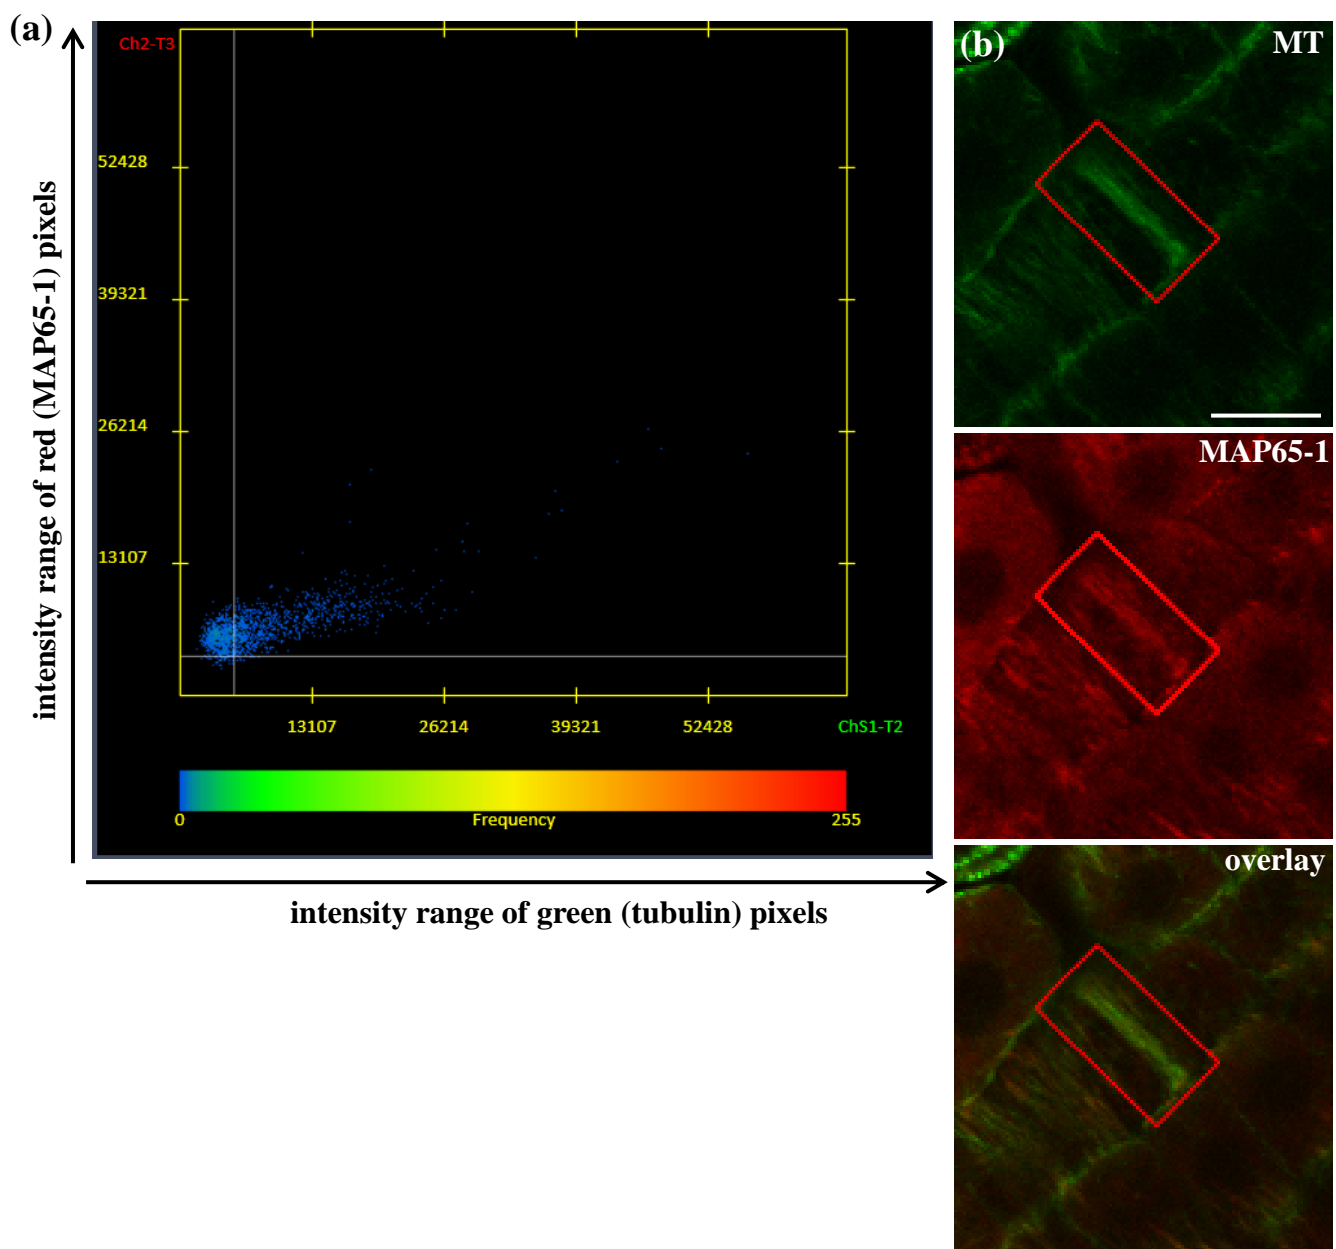

**Fig. S17** Scatter plot (a) demonstrating colocalization between PPB and MAP65-1 in a root epidermal preprophase cell of Ler outlined in (b) as shown in Figure 9b. Horizontal axis represents green channel (tubulin) and vertical axis represents red channel (MAP65-1). Crossed hairlines represent threshold setting according to Costes *et al.*, 2004 as explained in Materials and Methods sections. Colocalization occurs in the top right quadrant. Bar, 10  $\mu\text{m}$ .

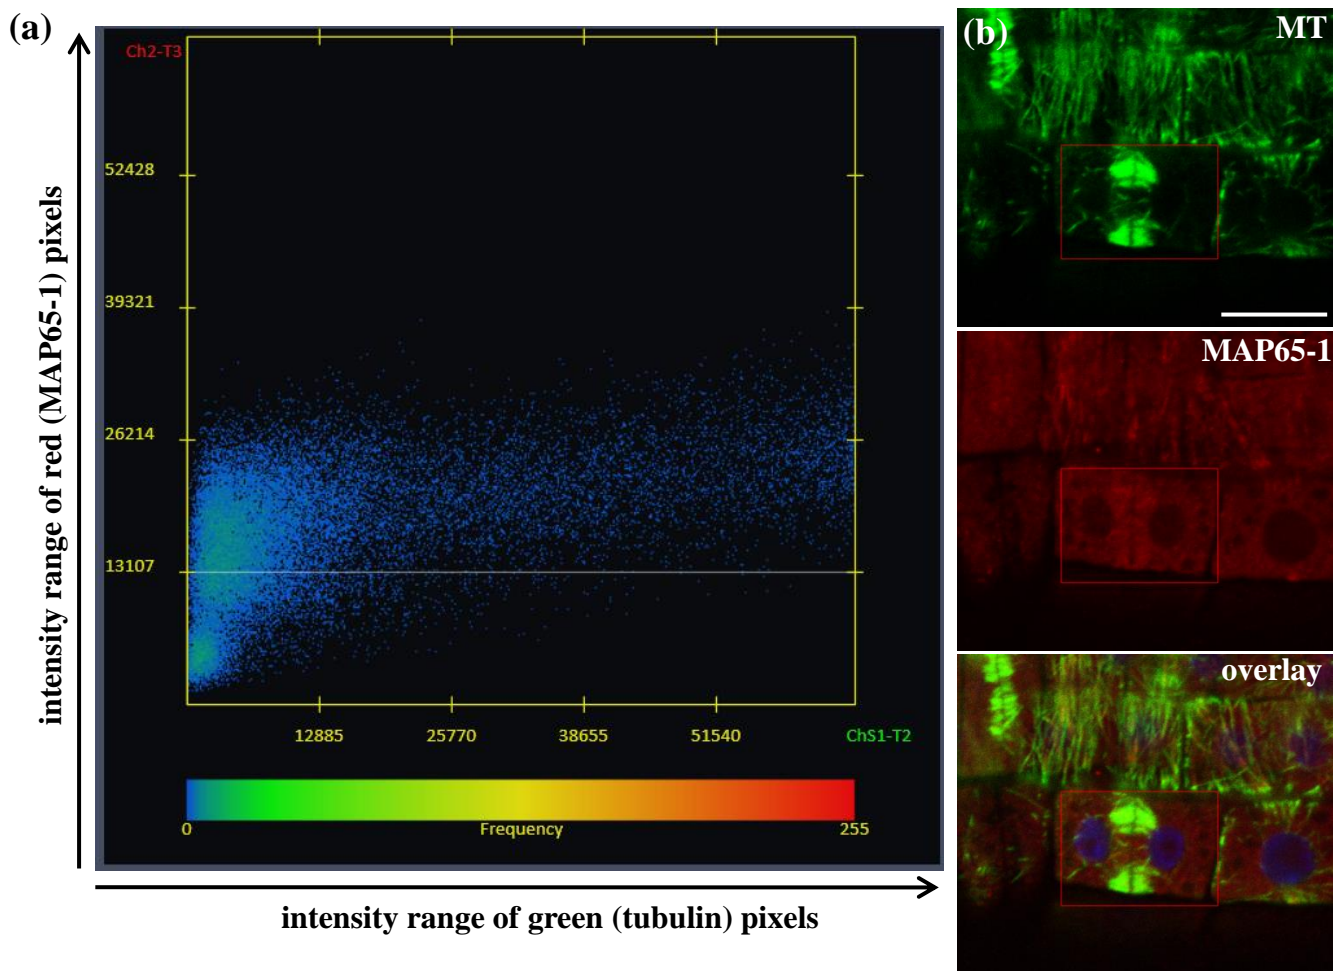

**Fig. S18** Scatter plot (a) demonstrating colocalization between microtubules and MAP65-1 in the phragmoplast of a root epidermal cytokinetic cell of Ler outlined in (b). Horizontal axis represents green channel (tubulin) and vertical axis represents red channel (MAP65-1). Crossed hairline (a) corresponds to threshold setting according to Costes *et al.*, 2004 as explained in Materials and Methods section. For red channel, threshold values coincided with y-axis so a hairline is not visible. Therefore colocalization occurs above horizontal hairline and right to the y-axis. Bar, 10  $\mu\text{m}$ .



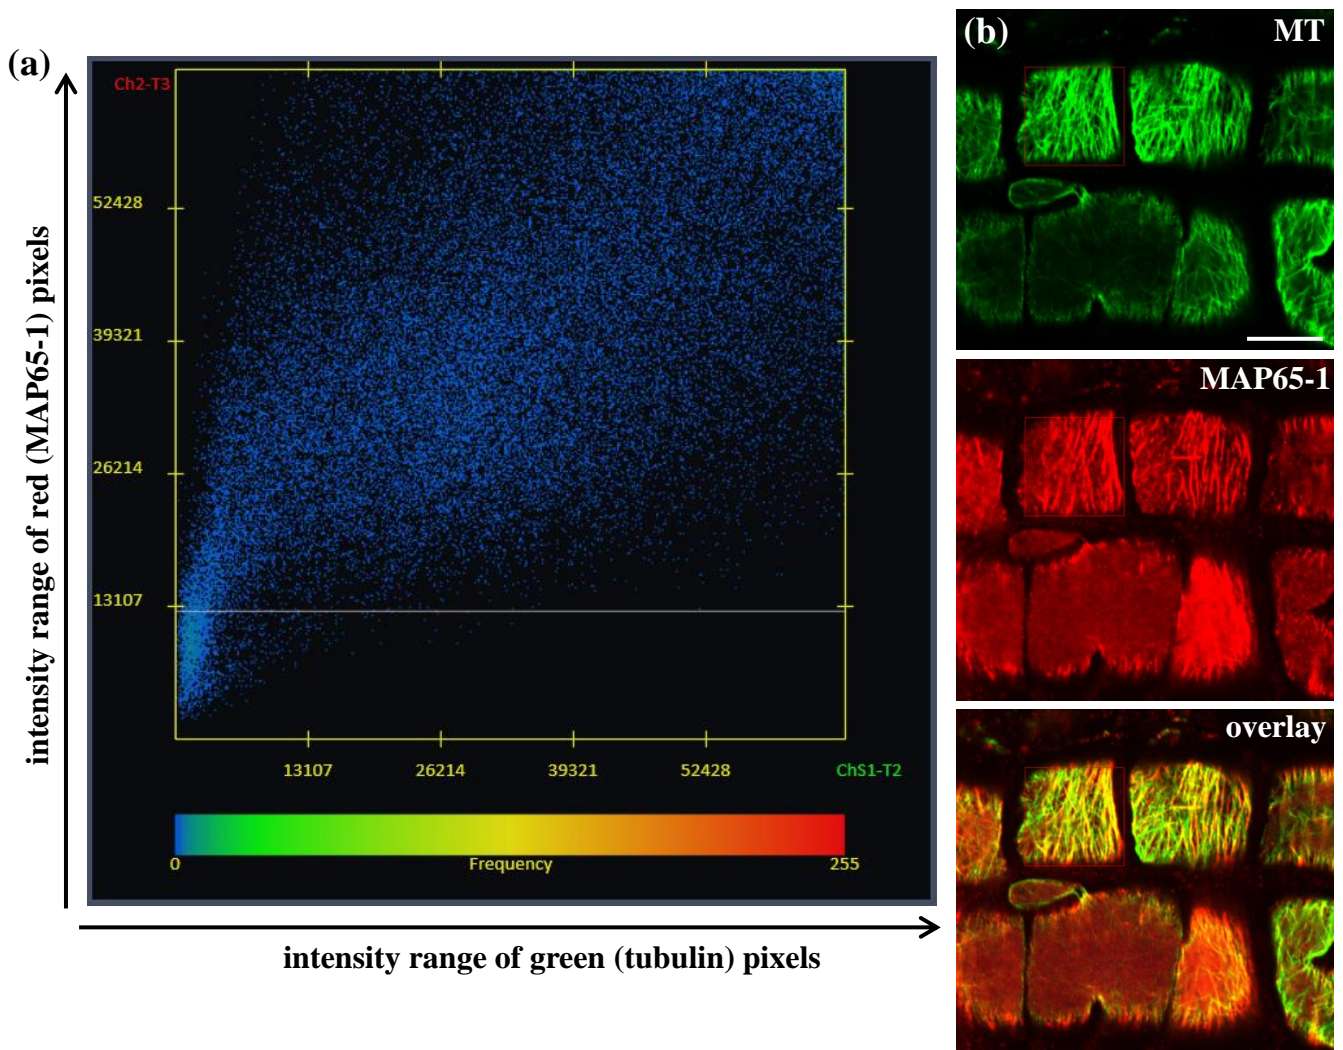

**Fig. S19** Scatter plot (a) demonstrating colocalization between cortical microtubules and MAP65-1 in the outlined root epidermal cell of *yda1* (b) presented in Figure 9d. Horizontal axis represents green channel (tubulin) and vertical axis represents red channel (MAP65-1). Crossed hairline (a) corresponds to threshold setting according to Costes *et al.*, 2004 as explained in Materials and Methods section. For red channel, threshold values coincided with y-axis so a hairline is not visible. Therefore colocalization occurs above horizontal hairline and right to the y-axis. Bar, 10  $\mu\text{m}$ .

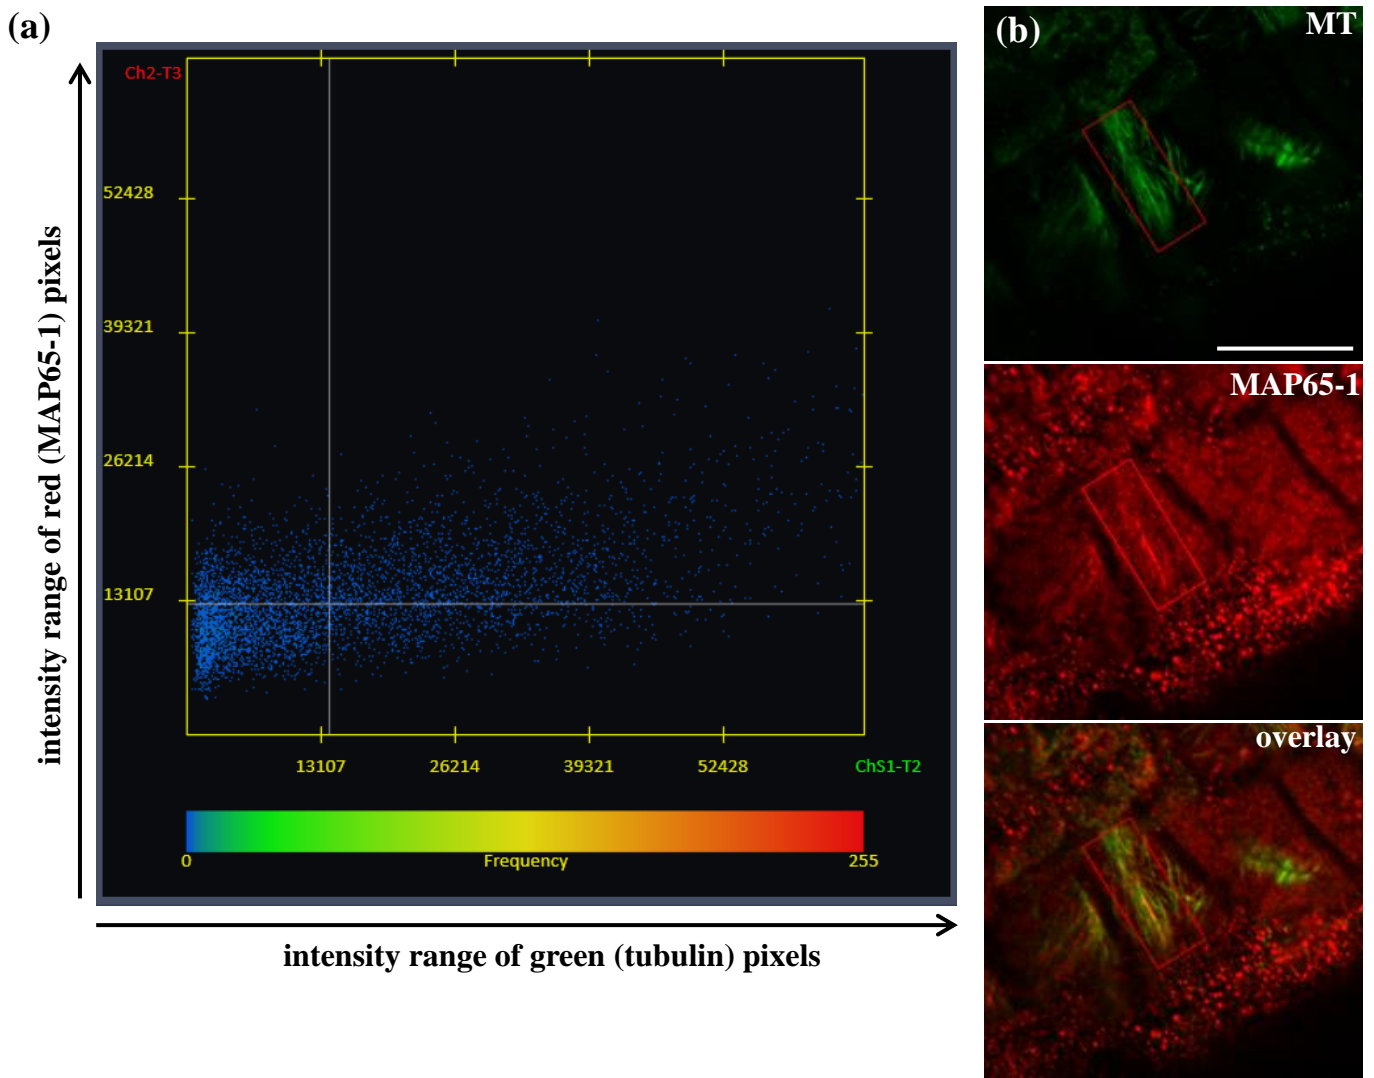



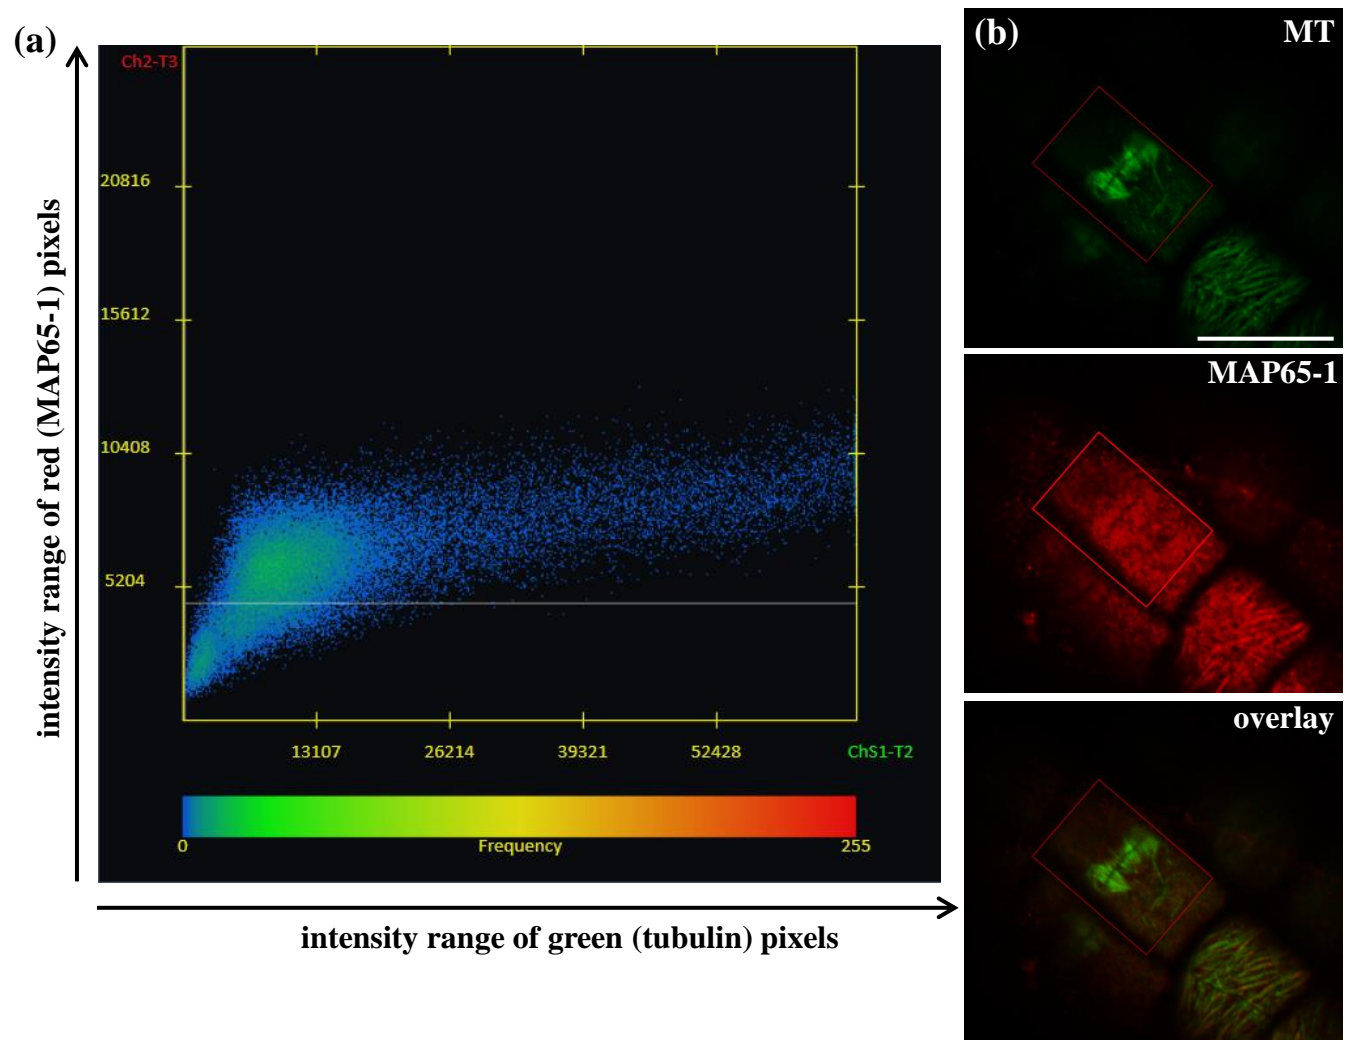

**Fig. S21** Scatter plot (a) demonstrating colocalization between microtubules and MAP65-1 in the phragmoplast of a root epidermal cytokinetic cell of *yda1* outlined in (b) selected from Figure 9f. Horizontal axis represents green channel (tubulin) and vertical axis represents red channel (MAP65-1). Crossed hairline (a) corresponds to threshold setting according to Costes *et al.*, 2004 as explained in Materials and Methods section. For red channel, threshold values coincided with y-axis so a hairline is not visible. Therefore colocalization occurs above horizontal hairline and right to the y-axis. Bar, 20  $\mu$ m.

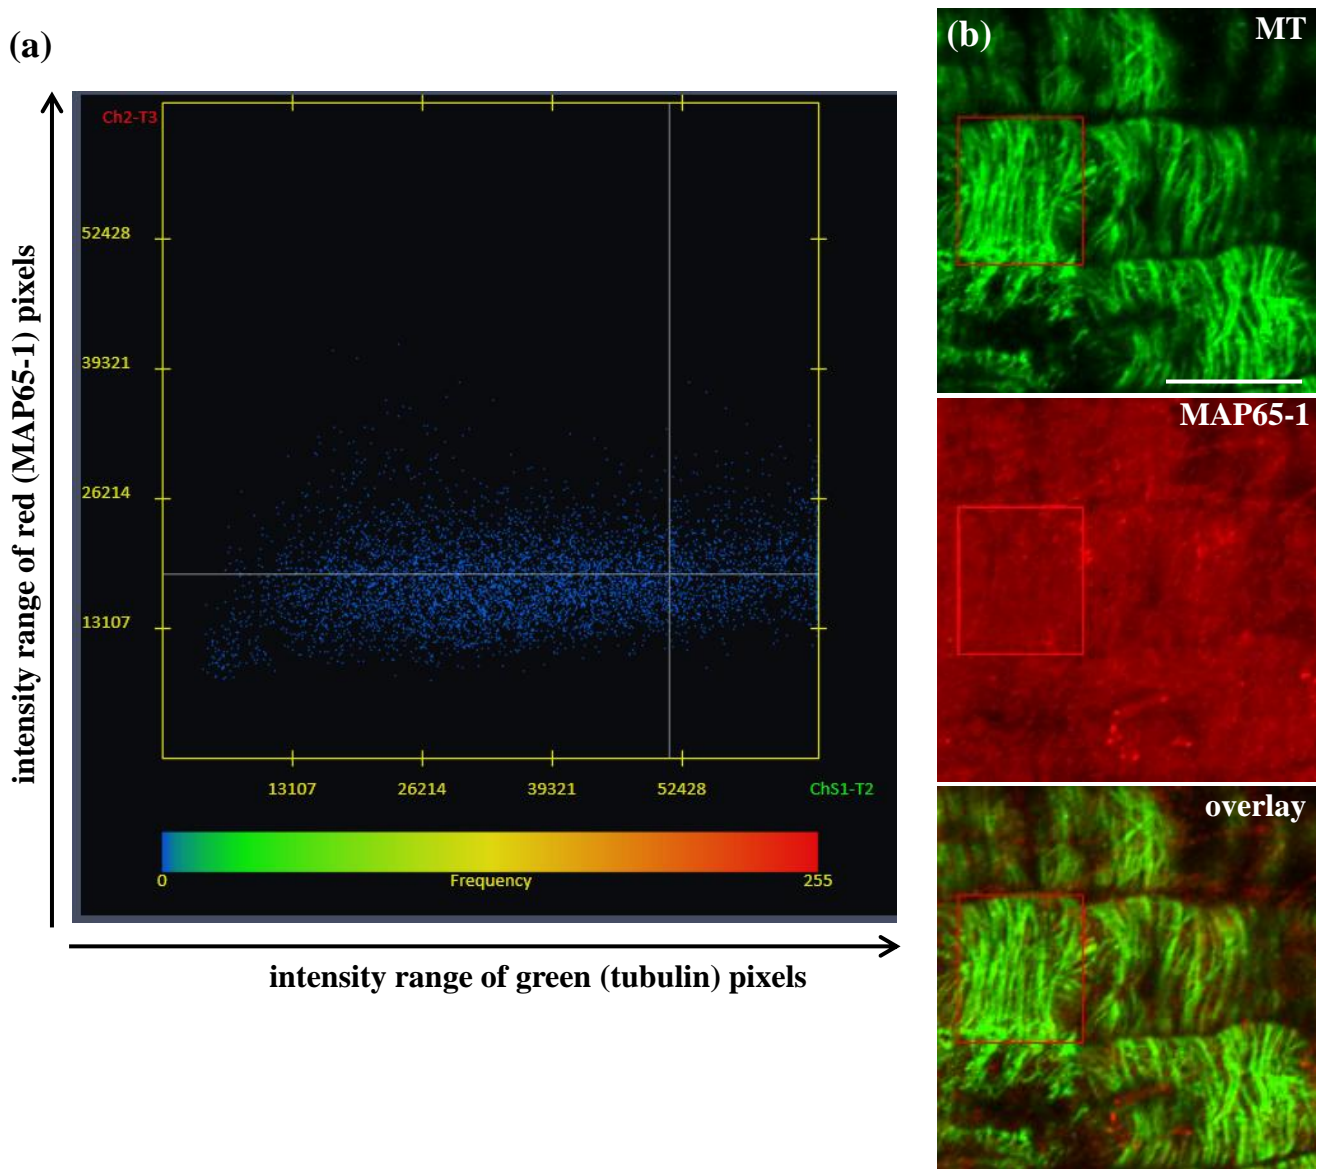

**Fig. S22** Scatter plot (a) demonstrating colocalization between cortical microtubules and MAP65-1 in a root epidermal cell of *ΔNydal* outlined in (b). Horizontal axis represents green channel (tubulin) and vertical axis represents red channel (MAP65-1). Crossed hairlines represent threshold setting according to Costes *et al.*, 2004 as explained in Materials and Methods sections. Colocalization occurs in the top right quadrant. Bar, 10  $\mu$ m.

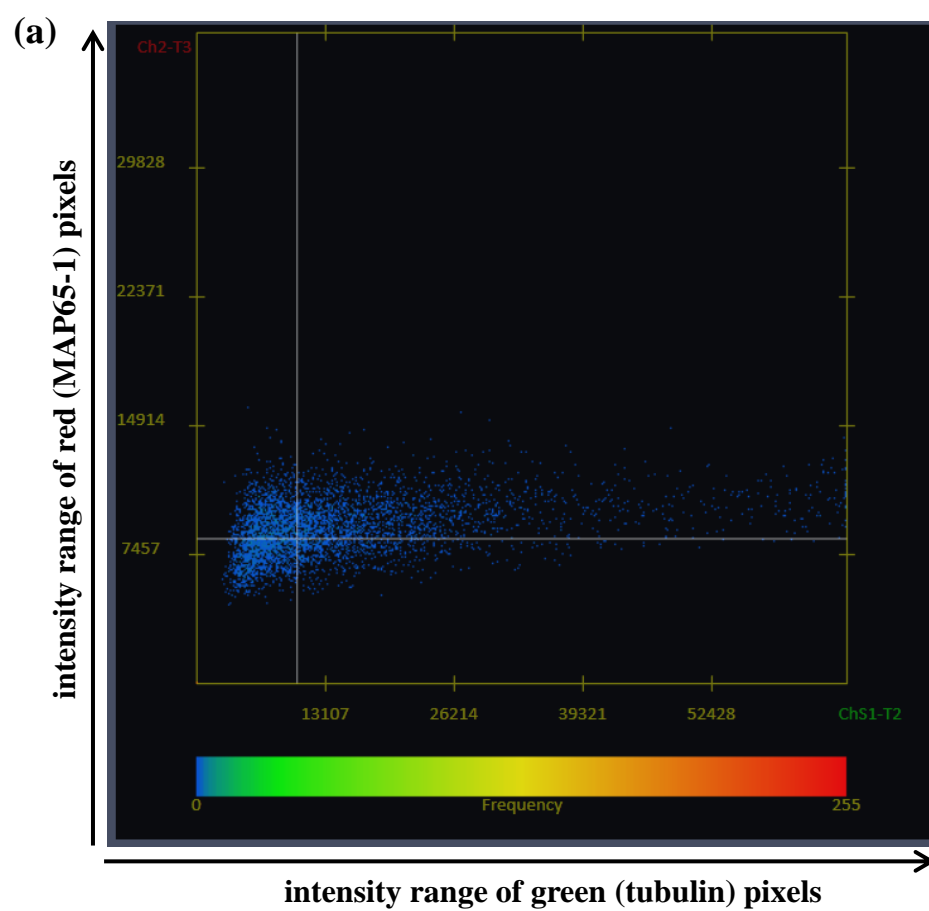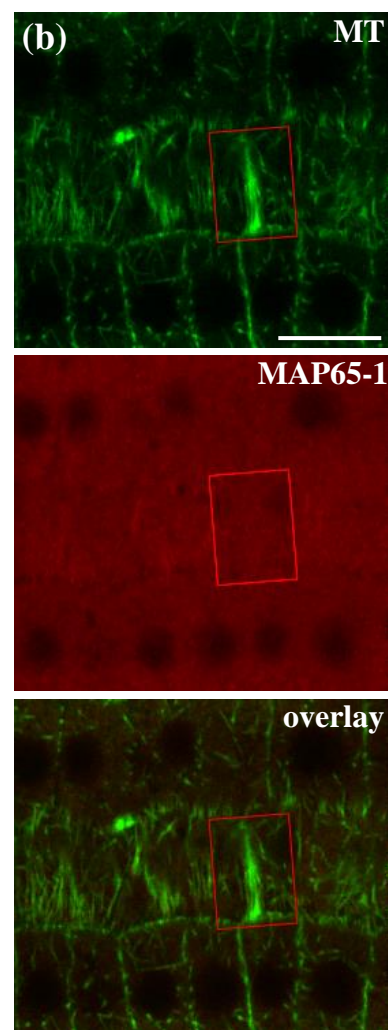

**Fig. S23** Scatter plot (a) demonstrating colocalization between microtubules and MAP65-1 in the PPB of a root epidermal preprophase cell of *A. Nydal* outlined in (b). Horizontal axis represents green channel (tubulin) and vertical axis represents red channel (MAP65-1). Crossed hairlines represent threshold setting according to Costes *et al.*, 2004 as explained in Materials and Methods sections. Colocalization occurs in the top right quadrant. Bar, 10  $\mu\text{m}$ .

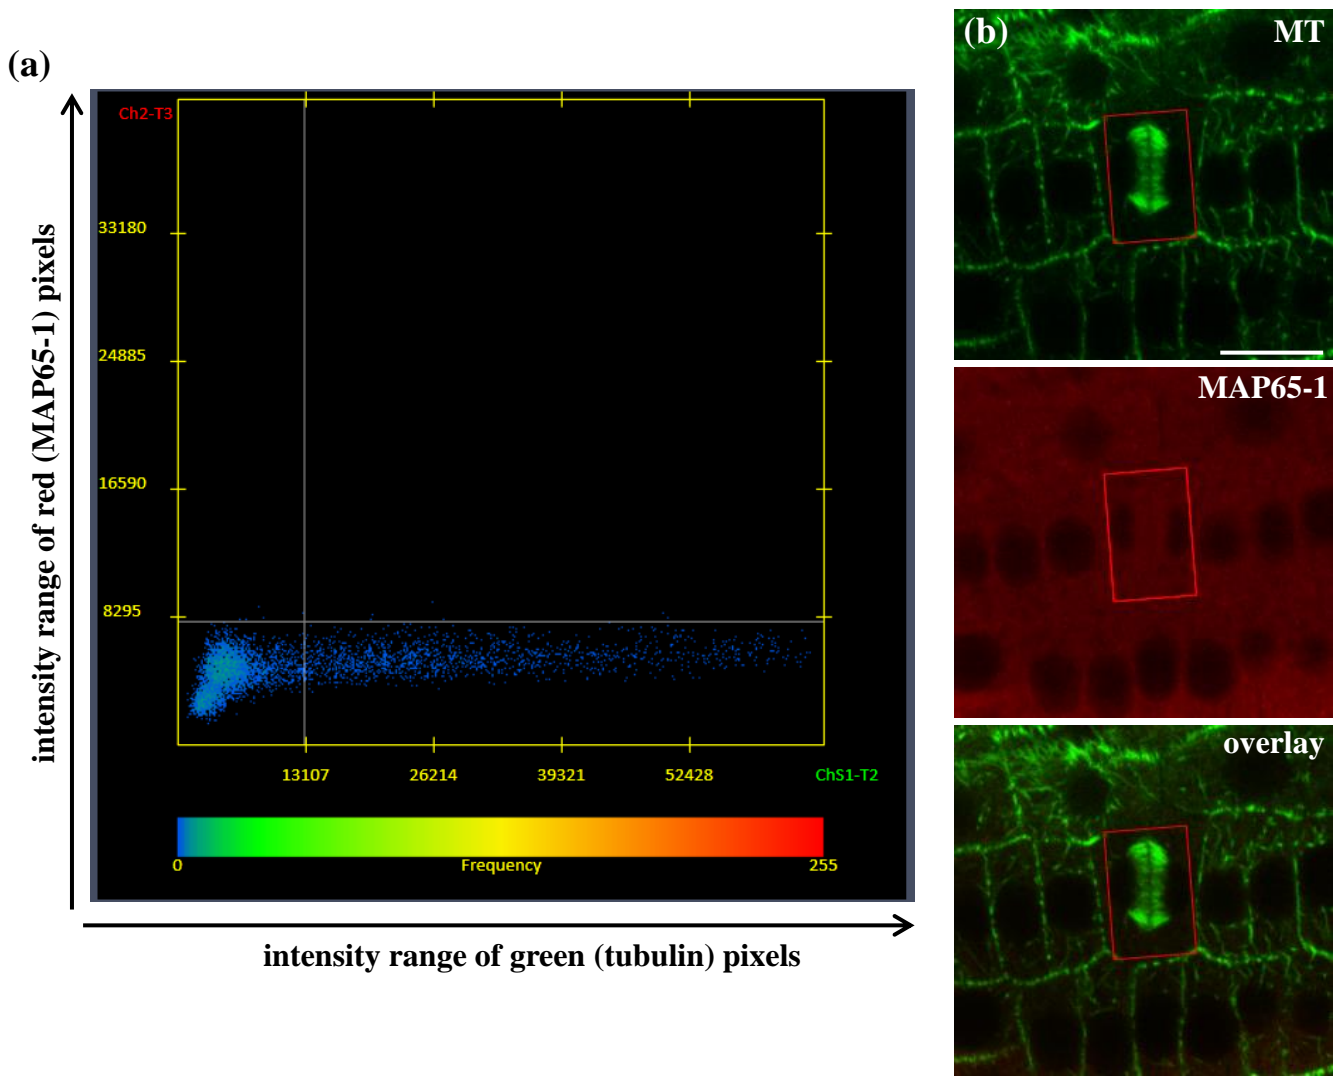

**Fig. S24** Scatter plot (a) demonstrating colocalization between microtubules and MAP65-1 in the phragmoplast of a root epidermal cell of *A. Nydal* outlined in (b) and depicted in Figure 9i. Horizontal axis represents green channel (tubulin) and vertical axis represents red channel (MAP65-1). Crossed hairlines represent threshold setting according to Costes *et al.*, 2004 as explained in Materials and Methods sections. Colocalization occurs in the top right quadrant. Bar, 10  $\mu$ m.
