# Supplementary material
Source: PubMed Central journal article supplement (PMC4414326)
Supplement: NIHMS680350-supplement-S2.pdf [file NIHMS680350-supplement-S2.pdf]

**Table S1** List of forward and reverse primers used for qRT-PCR quantitation of *MPK3*, *MPK6*, *YODA*, *TAN1*, *POK1*, *GCP4* and *EF1 $\alpha$*  gene transcripts, for amplifying of *MPK6* native promoter and *MPK6* genomic DNA for C-terminal and N-terminal GFP fusion.

| DESIGNATION | SEQUENCE                                                           | USE                   |
|-------------|--------------------------------------------------------------------|-----------------------|
| EF1 F       | 5'-TGAGCACGCTCTTCTTGCTTTCA-3'                                      | qRT-PCR               |
| EF1 R       | 5'-GGTGGTGGCATCCATCTTGTTACA-3'                                     | qRT-PCR               |
| MPK3 F      | 5'-GACAGAGTTGCTTGGCACACCGA-3'                                      | qRT-PCR               |
| MPK3 R      | 5'-GGCTGACGTGGGAAGTTGGGA-3'                                        | qRT-PCR               |
| MPK6 F      | 5'-ACAGCTTCCACCTTATCCTCGCCA-3'                                     | qRT-PCR               |
| MPK6 R      | 5'-TGGGCCAATGCGTCTAAAACACTGTG-3'                                   | qRT-PCR               |
| YODA F      | 5'-ATTTTGGGATGGCAAAACATA-3'                                        | qRT-PCR               |
| YODA R      | 5'-ACCTCAGGTGCCATCCAATA-3'                                         | qRT-PCR               |
| TAN1 F      | 5'-TGCTTCCTCACCAGGAGATTG-3'                                        | qRT-PCR               |
| TAN1 R      | 5'-TCTTTGGTGCTATGGCGTCC-3'                                         | qRT-PCR               |
| POK1 F      | 5'-CTGAGTCTGTTAGCTTCGCGG-3'                                        | qRT-PCR               |
| POK1 R      | 5'-TCTCAGCCTTATCAAACCTGCAC-3'                                      | qRT-PCR               |
| GCP4 F      | 5'-TTCACCGGCGATCTCATCGT-3'                                         | qRT-PCR               |
| GCP4 R      | 5'-ATCAAGTCCCTTCGCTGGGT-3'                                         | qRT-PCR               |
| Mpk6npF     | 5'- GGGGACAACCTTTGTATAGAAAAGTT<br>GCAGAAGAGACCCAAGTATCAGAAG -3'    | MultiSite<br>Gateway® |
| Mpk6npR     | 5'- GGGGACTGCTTTTTTGTACAAACTTGC<br>CGCGTAAAGATGAAAGCTTTTGAGG -3'   | MultiSite<br>Gateway® |
| Mpk6ctF     | 5'- GGGGACAAGTTTGTACAAAAAAGCA<br>GGCTCAATGGACGGTGGTTCAGGTC -3'     | MultiSite<br>Gatewayv |
| Mpk6ctR     | 5'- GGGGACCACTTTGTACAAGAAAGCTG<br>GGTTTTGCTGATATTCTGGATTGAAAGC -3' | MultiSite<br>Gateway® |
| Mpk6ntF     | 5'- GGGGACAGCTTCTTGTACAAAGT<br>GGGCATGGACGGTGGTTCAGGTC -3'         | MultiSite<br>Gateway® |
| Mpk6ntR     | 5'- GGGGACAACCTTTGTATAATAAAGT<br>TGCATCTCCCAAATGCTGTTCTTC -3'      | MultiSite<br>Gateway® |
