# Supplementary material
Source: PubMed Central journal article supplement (PMC4414326)
Supplement: NIHMS680350-supplement-S4.pdf [file NIHMS680350-supplement-S4.pdf]

**Table S3.** List of differentially regulated proteins in *yda1* mutant seedlings as identified by shot gun differential proteomic analysis. Only proteins with statistically significant change in abundance with ANOVA  $p \leq 0.05$  are presented in the table.

| Accession                   | Description                                            | Score  | Unique      | <i>yda1</i> :Ler_Ratio | Rel Profile SD |
|-----------------------------|--------------------------------------------------------|--------|-------------|------------------------|----------------|
| <b>Upregulated proteins</b> |                                                        |        |             |                        |                |
| NP_001119183.1              | glutamate dehydrogenase 2                              | 2082.5 | <i>yda1</i> |                        |                |
| NP_973900.2                 | spermidine synthase 1                                  | 288.19 | <i>yda1</i> |                        |                |
| NP_194091.1                 | cystine lyase                                          | 4223.5 | <i>yda1</i> |                        |                |
| NP_177837.1                 | alcohol dehydrogenase 1                                | 951.67 | <i>yda1</i> |                        |                |
| NP_173173.3                 | alanine aminotransferase                               | 740.49 | <i>yda1</i> |                        |                |
| NP_197069.1                 | reversibly glycosylated polypeptide 2                  | 234.04 | <i>yda1</i> |                        |                |
| NP_001031073.1              | catalase 3                                             | 11833  | <i>yda1</i> |                        |                |
| NP_850759.1                 | fructose bisphosphate aldolase 4                       | 3220.2 | <i>yda1</i> |                        |                |
| NP_195500.1                 | phosphoenolpyruvate carboxykinase ATP                  | 654.2  | <i>yda1</i> |                        |                |
| NP_190016.1                 | nitrilase 2                                            | 2456.9 | <i>yda1</i> |                        |                |
| NP_001078234.1              | nitrilase 1                                            | 552.03 |             | 3.706                  | 0.12           |
| NP_564647.1                 | GDSL esterase lipase                                   | 283.49 |             | 3.456                  | 0.14           |
| NP_190481.1                 | peroxidase 34                                          | 1976.3 |             | 3.254                  | 0.07           |
| NP_196982.1                 | formate dehydrogenase                                  | 1719.9 |             | 3.034                  | 0.08           |
| NP_001078275.1              | pyruvate kinase                                        | 377.32 |             | 2.915                  | 0.24           |
| NP_192839.1                 | nucleoside diphosphate kinase 3                        | 1001.7 |             | 2.509                  | 0.16           |
| NP_973873.1                 | catalase 3                                             | 4378.3 |             | 2.460                  | 0.05           |
| NP_180873.1                 | 3 ketoacyl CoA thiolase 2                              | 700.54 |             | 2.411                  | 0.13           |
| NP_197972.2                 | myrosinase 1                                           | 946.28 |             | 2.363                  | 0.1            |
| NP_173732.1                 | putative phosphoglucomutase                            | 694.05 |             | 2.363                  | 0.21           |
| NP_001118421.1              | aspartate aminotransferase                             | 518.6  |             | 2.316                  | 0.16           |
| NP_001190885.1              | aspartate aminotransferase                             | 574.66 |             | 2.293                  | 0.16           |
| NP_200227.1                 | caffeic acid 5 hydroxyferulic acid O methyltransferase | 712.34 |             | 2.293                  | 0.17           |

|                |                                                                                                     |        |       |      |
|----------------|-----------------------------------------------------------------------------------------------------|--------|-------|------|
| NP_190468.1    | 4 coumarate CoA ligase like 10                                                                      | 353.65 | 2.248 | 0.31 |
| NP_174810.1    | annexin 1                                                                                           | 5169.2 | 2.203 | 0.07 |
| NP_195146.1    | D 3 phosphoglycerate dehydrogenase                                                                  | 802.62 | 2.203 | 0.14 |
| NP_192202.1    | putative elongation factor Tu                                                                       | 413.45 | 2.138 | 0.29 |
| NP_175802.1    | GDSL esterase lipase                                                                                | 748.11 | 2.138 | 0.15 |
| NP_179997.1    | aminopeptidase family protein                                                                       | 431.4  | 2.138 | 0.14 |
| NP_564571.1    | Formate tetrahydrofolate ligase                                                                     | 232.11 | 2.117 | 0.19 |
| NP_171936.1    | malate dehydrogenase                                                                                | 10056  | 2.096 | 0.05 |
| NP_191703.1    | cysteine synthase C1                                                                                | 2883.5 | 2.096 | 0.09 |
| NP_001077901.1 | cyclophilin ROC3                                                                                    | 4284.4 | 2.096 | 0.08 |
| NP_172801.1    | glyceraldehyde 3 phosphate dehydrogenase                                                            | 32745  | 2.054 | 0.04 |
| NP_195288.1    | phosphoserine aminotransferase                                                                      | 910.89 | 2.014 | 0.17 |
| NP_001031879.1 | isopropylmalate dehydrogenase 1                                                                     | 1329.7 | 1.994 | 0.1  |
| NP_180644.1    | glutathione S transferase PHI 10                                                                    | 1487.5 | 1.994 | 0.02 |
| NP_849696.1    | protein disulfide isomerase like 1 1                                                                | 1128.8 | 1.974 | 0.02 |
| NP_181192.1    | bifunctional enolase 2 transcriptional activator                                                    | 5373.4 | 1.954 | 0.15 |
| NP_193361.4    | putative beta 1 3 endoglucanase that interacts with the 30C02 cyst nematode effector May play a rol | 373.73 | 1.954 | 0.15 |
| NP_849841.1    | Monodehydroascorbate reductase                                                                      | 2132.2 | 1.954 | 0.1  |
| NP_196521.1    | mitochondrial HSO70 2                                                                               | 1687.1 | 1.954 | 0.12 |
| NP_178634.2    | aconitate hydratase 3                                                                               | 777.99 | 1.935 | 0.04 |
| NP_568098.1    | ABA modulated tyrosine phosphorylated protein                                                       | 1232.1 | 1.935 | 0.24 |
| NP_190336.1    | malate dehydrogenase                                                                                | 1840.6 | 1.935 | 0.1  |
| NP_186858.1    | probable mitochondrial processing peptidase subunit beta                                            | 1077.8 | 1.916 | 0.11 |
| NP_195504.2    | heat shock protein 70 1                                                                             | 562.3  | 1.916 | 0.1  |
| NP_177958.1    | glutathione S transferase TAU 20                                                                    | 1706.6 | 1.896 | 0.22 |
| NP_190856.1    | monodehydroascorbate reductase NADH                                                                 | 1304.8 | 1.878 | 0.17 |
| NP_001190274.1 | 40S ribosomal protein S6 2                                                                          | 3742.5 | 1.878 | 0.11 |
| NP_175314.1    | 40S ribosomal protein S7 1                                                                          | 716.01 | 1.840 | 0.17 |
| NP_191104.1    | triosephosphate isomerase                                                                           | 15871  | 1.822 | 0.11 |

|                |                                                    |        |       |      |
|----------------|----------------------------------------------------|--------|-------|------|
| NP_566840.1    | AIG2 like protein                                  | 716.88 | 1.822 | 0.11 |
| NP_186777.1    | voltage dependent anion channel 1                  | 2042   | 1.804 | 0.15 |
| NP_199017.2    | Luminal binding protein 2                          | 6538.6 | 1.804 | 0.14 |
| NP_192161.1    | glutathione S transferase F2                       | 28650  | 1.786 | 0.29 |
| NP_197960.1    | NADP dependent malic enzyme 3                      | 728.76 | 1.786 | 0.06 |
| NP_198206.1    | Luminal binding protein 1                          | 6829.5 | 1.786 | 0.25 |
| NP_193129.1    | serine hydroxymethyltransferase 4                  | 2569.6 | 1.751 | 0.15 |
| NP_191008.1    | aspartyl protease family protein                   | 952.42 | 1.733 | 0.05 |
| NP_199207.1    | alcohol dehydrogenase class 3                      | 536.08 | 1.716 | 0.04 |
| NP_849818.1    | elongation factor EF 2                             | 2610.9 | 1.716 | 0.18 |
| NP_001189665.1 | heat shock protein 60 2                            | 811.64 | 1.699 | 0.05 |
| NP_181187.1    | fructose bisphosphate aldolase 6                   | 4544.4 | 1.682 | 0.08 |
| NP_189041.1    | heat shock protein 60                              | 1432.6 | 1.682 | 0.12 |
| NP_200288.1    | thiazole biosynthetic enzyme                       | 224.58 | 1.682 | 0.14 |
| NP_190861.1    | fructose bisphosphate aldolase                     | 8781.3 | 1.649 | 0.07 |
| NP_565178.1    | glutathione S transferase TAU 19                   | 1937   | 1.649 | 0.12 |
| NP_195308.1    | aconitate hydratase 1                              | 441.72 | 1.632 | 0.06 |
| NP_199898.1    | pyruvate dehydrogenase E1 beta                     | 2295.7 | 1.632 | 0.08 |
| NP_850018.1    | mitochondrial F1F0 ATP synthase subunit Fad        | 2937.4 | 1.632 | 0.17 |
| NP_177875.1    | protein disulfide isomerase 2                      | 644.67 | 1.616 | 0.05 |
| NP_201145.1    | adenylate kinase 1                                 | 2030.4 | 1.616 | 0.11 |
| NP_568204.1    | ATP synthase subunit beta 2                        | 10919  | 1.616 | 0.15 |
| NP_179393.1    | ribosomal protein L2 family protein                | 2406.6 | 1.616 | 0.12 |
| NP_851137.1    | 60S ribosomal protein L11 2                        | 4557   | 1.600 | 0.15 |
| NP_178788.1    | ATPase F1 complex alpha subunit protein            | 3743   | 1.600 | 0.16 |
| NP_195870.1    | heat shock cognate protein 70 1                    | 17394  | 1.600 | 0.17 |
| NP_564625.1    | malate dehydrogenase 1                             | 14860  | 1.600 | 0.18 |
| NP_001119156.1 | heat shock cognate protein 70 1                    | 16376  | 1.600 | 0.07 |
| NP_001031628.1 | adenosylhomocysteinase                             | 7423.1 | 1.584 | 0.14 |
| NP_197294.1    | 5 methyltetrahydropteroyltriglutamate homocysteine | 12835  | 1.584 | 0.13 |

|                |                                                        |        |       |      |
|----------------|--------------------------------------------------------|--------|-------|------|
|                | methyltransferase                                      |        |       |      |
| NP_849932.1    | Chaperone protein htpG family protein                  | 1602.2 | 1.584 | 0.09 |
| NP_176768.1    | isocitrate dehydrogenase                               | 12799  | 1.584 | 0.03 |
| NP_085571.2    | ATPase subunit 1                                       | 3635.5 | 1.584 | 0.09 |
| NP_001030663.1 | 60S ribosomal protein L4 1                             | 1244.8 | 1.568 | 0.03 |
| NP_001030698.1 | protein DJ 1 like A                                    | 2418   | 1.568 | 0.11 |
| NP_974269.1    | adenosine kinase 1                                     | 6013.3 | 1.568 | 0.04 |
| NP_187555.1    | heat shock protein 70 3                                | 11268  | 1.568 | 0.1  |
| NP_565191.1    | curculin like mannose binding lectin like protein      | 501.86 | 1.553 | 0.11 |
| NP_564418.1    | 60S ribosomal protein L9 1                             | 5030.3 | 1.553 | 0.06 |
| NP_001189847.1 | heat shock protein 70 3                                | 11268  | 1.553 | 0.06 |
| NP_198403.1    | 40S ribosomal protein S3 3                             | 2957.4 | 1.553 | 0.13 |
| NP_567763.2    | aconitase 2                                            | 244.94 | 1.553 | 0.12 |
| NP_178011.1    | V type proton ATPase catalytic subunit A               | 1514.8 | 1.553 | 0.11 |
| NP_187864.1    | heat shock protein 70 4                                | 9733.6 | 1.553 | 0.05 |
| NP_565527.1    | PLAT plant stress domain containing protein            | 1318.8 | 1.537 | 0.15 |
| NP_001189621.1 | 60S acidic ribosomal protein P2 2                      | 14196  | 1.537 | 0.11 |
| NP_051110.1    | photosystem I subunit VII                              | 20097  | 1.522 | 0.05 |
| NP_850490.1    | carbonic anhydrase 1                                   | 35526  | 1.522 | 0.2  |
| NP_567818.2    | photosystem I reaction center subunit E                | 25606  | 1.522 | 0.19 |
| NP_173459.1    | DNA damage resistance protein DRT112                   | 21968  | 1.522 | 0.08 |
|                | <b>Downregulated proteins</b>                          |        |       |      |
| NP_051044.1    | ATP synthase CF1 alpha subunit                         | 21797  | 0.657 | 0.03 |
| NP_001031969.1 | glutamine synthetase                                   | 14743  | 0.657 | 0.05 |
| NP_174996.1    | glyceraldehyde 3 phosphate dehydrogenase B             | 16356  | 0.644 | 0.03 |
| NP_190651.1    | oxygen evolving enhancer protein 1 2                   | 21452  | 0.631 | 0.04 |
| NP_565913.1    | ribulose biphosphate carboxylase oxygenase<br>activase | 63984  | 0.613 | 0.02 |
| NP_198659.1    | ribulose biphosphate carboxylase small chain 1B        | 56854  | 0.607 | 0.02 |
| NP_850321.1    | ribulose biphosphate carboxylase oxygenase<br>activase | 61872  | 0.607 | 0.03 |

|                |                                                        |        |     |       |      |
|----------------|--------------------------------------------------------|--------|-----|-------|------|
| NP_192703.1    | F type H transporting ATPase subunit delta             | 1374   |     | 0.600 | 0.18 |
| NP_001190778.1 | plasma membrane associated cation binding protein 1    | 5168.7 |     | 0.589 | 0.17 |
| NP_849295.1    | cytochrome b6 f complex iron sulfur subunit            | 16620  |     | 0.589 | 0.09 |
| NP_001117239.1 | photosystem II subunit P 1                             | 22825  |     | 0.583 | 0.05 |
| NP_172405.1    | chloroplast stem loop binding protein                  | 9518.9 |     | 0.583 | 0.09 |
| NP_974782.1    | carbonic anhydrase 2                                   | 28632  |     | 0.571 | 0.06 |
| NP_193860.1    | oxygen evolving complex of photosystem II subunit PsbQ | 23096  |     | 0.566 | 0.04 |
| NP_171812.1    | photosystem I reaction center subunit D 2              | 18836  |     | 0.533 | 0.06 |
| NP_565786.1    | photosystem II light harvesting complex protein B1B2   | 15484  |     | 0.517 | 0.07 |
| NP_051110.1    | photosystem I subunit VII                              | 20097  |     | 0.482 | 0.12 |
| NP_850490.1    | carbonic anhydrase 1                                   | 35526  |     | 0.482 | 0.04 |
| NP_567818.2    | photosystem I reaction center subunit E                | 25606  |     | 0.458 | 0.08 |
| NP_173459.1    | DNA damage resistance protein DRT112                   | 21968  |     | 0.353 | 0.09 |
| NP_001189913.1 | JA responsive protein 1                                | 2256.9 | Ler |       |      |
| NP_178073.1    | phosphoglycerate kinase                                | 9757.4 | Ler |       |      |
| NP_173386.1    | Glutathione S transferase like protein                 | 1129.2 | Ler |       |      |
| NP_568437.1    | tubulin beta 8 chain                                   | 1187   | Ler |       |      |
| NP_196598.1    | 40S ribosomal protein S6 2                             | 3833.6 | Ler |       |      |
| NP_565265.1    | MLP like protein 329                                   | 13142  | Ler |       |      |
| NP_197563.1    | germin like protein subfamily 3 member 3               | 903.35 | Ler |       |      |
