# Supplementary material
Source: PubMed Central journal article supplement (PMC4414326)
Supplement: NIHMS680350-supplement-S5.pdf [file NIHMS680350-supplement-S5.pdf]

**Table S4.** List of differentially regulated proteins in  $\Delta Nyda1$  mutant seedlings as identified by shot gun differential proteomic analysis. Only proteins with statistically significant change in abundance with ANOVA  $p \leq 0.05$  are presented in the table.

| Accession                   | Description                               | Score  | Unique         | $\Delta Nyda1$ :Ler_<br>Ratio | Rel Profile<br>SD |
|-----------------------------|-------------------------------------------|--------|----------------|-------------------------------|-------------------|
| <b>Upregulated proteins</b> |                                           |        |                |                               |                   |
| NP_171792.1                 | glutathione S transferase 6               | 22430  | $\Delta Nyda1$ |                               |                   |
| NP_564034.1                 | D 3 phosphoglycerate dehydrogenase        | 2104.9 | $\Delta Nyda1$ |                               |                   |
| NP_200261.1                 | flavodoxin like quinone reductase 1       | 1942.7 | $\Delta Nyda1$ |                               |                   |
| NP_001031647.1              | pyruvate phosphate dikinase 1             | 555.87 | $\Delta Nyda1$ |                               |                   |
| NP_176794.1                 | glutamine synthetase                      | 3659.2 | $\Delta Nyda1$ |                               |                   |
| NP_851005.1                 | dihydrolipoyl dehydrogenase 2             | 3066.4 | $\Delta Nyda1$ |                               |                   |
| NP_566875.1                 | lipoxygenase 2                            | 2941.1 | $\Delta Nyda1$ |                               |                   |
| NP_171791.1                 | glutathione S transferase 7 11            | 20497  | $\Delta Nyda1$ |                               |                   |
| NP_194091.1                 | cystine lyase                             | 9566.6 | $\Delta Nyda1$ |                               |                   |
| NP_565061.1                 | kunitz trypsin inhibitor 1                | 5540.3 | $\Delta Nyda1$ |                               |                   |
| NP_565491.1                 | protein THYLAKOID FORMATION 1             | 3179   | $\Delta Nyda1$ |                               |                   |
| NP_195213.1                 | rotamase cyclophilin 5                    | 11210  | $\Delta Nyda1$ |                               |                   |
| NP_566700.1                 | gamma aminobutyrate transaminase POP2     | 1380.7 | $\Delta Nyda1$ |                               |                   |
| NP_173173.3                 | alanine aminotransferase                  | 880.27 | $\Delta Nyda1$ |                               |                   |
| NP_566776.1                 | allene oxide cyclase 2                    | 2950.9 | $\Delta Nyda1$ |                               |                   |
| NP_188274.1                 | legume lectin like protein                | 25172  | $\Delta Nyda1$ |                               |                   |
| NP_001031073.1              | catalase 3                                | 21156  | $\Delta Nyda1$ |                               |                   |
| NP_197501.1                 | GTP binding nuclear protein Ran 1         | 1434.1 | $\Delta Nyda1$ |                               |                   |
| NP_567004.1                 | tryptophan synthase alpha chain           | 2948.3 | $\Delta Nyda1$ |                               |                   |
| NP_171994.1                 | 1 aminocyclopropane 1 carboxylate oxidase | 4015.1 | $\Delta Nyda1$ |                               |                   |
| NP_850363.1                 | actin family protein                      | 455.3  | $\Delta Nyda1$ |                               |                   |
| NP_190383.1                 | aldehyde dehydrogenase 2B4                | 910.2  | $\Delta Nyda1$ |                               |                   |

|                |                                                               |        |               |        |
|----------------|---------------------------------------------------------------|--------|---------------|--------|
| NP_190018.1    | nitrilase 3                                                   | 1431.6 | <i>ΔNydal</i> |        |
| NP_683568.1    | lectin like protein                                           | 30803  |               | 10.697 |
| NP_187123.1    | pathogenesis related 4                                        | 13323  |               | 7.70   |
| NP_192161.1    | glutathione S transferase F2                                  | 101414 |               | 6.959  |
| NP_973873.1    | catalase 3                                                    | 19017  |               | 3.857  |
| NP_180644.1    | glutathione S transferase PHI 10                              | 10096  |               | 3.633  |
| NP_175806.3    | epithiospecifier protein                                      | 34930  |               | 3.561  |
| NP_850963.1    | epithiospecifier protein                                      | 31406  |               | 3.561  |
| NP_191703.1    | cysteine synthase C1                                          | 14284  |               | 3.490  |
| NP_196982.1    | formate dehydrogenase                                         | 7243.1 |               | 3.320  |
| NP_192617.1    | putative apoplatic peroxidase Prx37                           | 3954.1 |               | 3.287  |
| NP_195146.1    | D 3 phosphoglycerate dehydrogenase                            | 6865.2 |               | 3.287  |
| NP_193361.4    | putative beta 1 3 endoglucanase                               | 2832.9 |               | 3.190  |
| NP_190481.1    | peroxidase 34                                                 | 4842.9 |               | 3.190  |
| NP_566840.1    | AIG2 like protein                                             | 5671.5 |               | 3.190  |
| NP_188048.1    | pectin methylesterase 3                                       | 4542   |               | 3.065  |
| NP_564571.1    | Formate tetrahydrofolate ligase                               | 2825.4 |               | 2.915  |
| NP_195288.1    | phosphoserine aminotransferase                                | 2215.2 |               | 2.915  |
| NP_565191.1    | curculin like mannose binding lectin like protein             | 5136.8 |               | 2.801  |
| NP_564647.1    | GDSL esterase lipase                                          | 2810.3 |               | 2.718  |
| NP_193955.1    | plastid lipid associated protein PAP fibrillin family protein | 8561.6 |               | 2.612  |
| NP_192311.1    | fibrillin                                                     | 657.75 |               | 2.535  |
| NP_001031791.1 | catalase 2                                                    | 8397.8 |               | 2.509  |
| NP_566268.1    | peroxiredoxin 2F                                              | 4351.1 |               | 2.293  |
| NP_190468.1    | 4 coumarate CoA ligase like 10                                | 1160   |               | 2.248  |
| NP_195683.1    | Lipase lipooxygenase PLAT LH2 family protein                  | 700.55 |               | 2.226  |
| NP_192839.1    | nucleoside diphosphate kinase 3                               | 1233.5 |               | 2.226  |
| NP_566728.1    | FIBRILLIN 4                                                   | 3538   |               | 2.138  |
| NP_197960.1    | NADP dependent malic enzyme 3                                 | 1595.5 |               | 2.138  |
| NP_563841.1    | uncharacterized protein                                       | 3334.7 |               | 2.117  |

|                |                                               |        |       |      |
|----------------|-----------------------------------------------|--------|-------|------|
| NP_180873.1    | 3 ketoacyl CoA thiolase 2                     | 1788.1 | 2.096 | 0.66 |
| NP_568125.1    | monodehydroascorbate reductase NADH           | 2724.8 | 2.075 | 0.56 |
| NP_196728.1    | NADP dependent malic enzyme 2                 | 3428.6 | 2.075 | 0.52 |
| NP_568098.1    | ABA modulated tyrosine phosphorylated protein | 4043.8 | 2.014 | 0.28 |
| NP_201209.1    | photosystem I reaction center subunit N       | 4434.9 | 1.954 | 0.92 |
| NP_564192.2    | glutamate glyoxylate aminotransferase         | 13593  | 1.935 | 0.37 |
| NP_001119093.1 | heat shock protein 70 family protein          | 2498.1 | 1.916 | 0.51 |
| NP_178634.2    | aconitate hydratase 3                         | 1217.5 | 1.916 | 0.70 |
| NP_568336.1    | glutathione S transferase DHAR3               | 1686.3 | 1.896 | 0.22 |
| NP_564497.1    | cysteine proteinase RD21a                     | 2959.9 | 1.859 | 0.17 |
| NP_974958.1    | lactate malate dehydrogenase family protein   | 1527.7 | 1.840 | 0.88 |
| NP_179997.1    | aminopeptidase family protein                 | 2932.9 | 1.822 | 0.33 |
| NP_849841.1    | Monodehydroascorbate reductase                | 4167   | 1.804 | 0.62 |
| NP_201145.1    | adenylate kinase 1                            | 2370.9 | 1.768 | 0.25 |
| NP_001189587.1 | aminopeptidase family protein                 | 2059   | 1.682 | 0.54 |
| NP_565178.1    | glutathione S transferase TAU 19              | 2539.9 | 1.682 | 0.37 |
| NP_175237.1    | dihydrolipoyl dehydrogenase 1                 | 7400.4 | 1.665 | 0.19 |
| NP_001154203.1 | thioredoxin M2                                | 14414  | 1.649 | 0.41 |
| NP_173732.1    | putative phosphoglucomutase                   | 1410.6 | 1.616 | 0.42 |
| NP_196527.1    | soluble inorganic pyrophosphatase 1           | 5165.8 | 1.584 | 0.25 |
| NP_195506.1    | serine transhydroxymethyltransferase 1        | 18634  | 1.568 | 0.22 |
| NP_849646.1    | aminomethyltransferase                        | 6325.4 | 1.568 | 0.30 |
| NP_199898.1    | pyruvate dehydrogenase E1 beta                | 5171   | 1.568 | 0.57 |

---

**Downregulated proteins**

|                |                                               |        |       |      |
|----------------|-----------------------------------------------|--------|-------|------|
| NP_850903.1    | small subunit ribosomal protein S1            | 1169.1 | 0.651 | 0.07 |
| NP_001032018.1 | beta ketoacyl acyl carrier protein synthase I | 614.62 | 0.644 | 0.08 |
| NP_051110.1    | photosystem I subunit VII                     | 16731  | 0.644 | 0.04 |
| NP_001031217.1 | PSI type III chlorophyll a b binding protein  | 3213   | 0.631 | 0.05 |
| NP_849295.1    | cytochrome b6 f complex iron sulfur subunit   | 10167  | 0.619 | 0.03 |
| NP_197563.1    | germin like protein subfamily 3 member 3      | 1350.9 | 0.607 | 0.07 |

|                |                                                                      |        |     |       |      |
|----------------|----------------------------------------------------------------------|--------|-----|-------|------|
| NP_177958.1    | glutathione S transferase TAU 20                                     | 715.69 |     | 0.566 | 0.06 |
| NP_001030708.1 | DNA topoisomerase like protein                                       | 914.23 |     | 0.522 | 0.04 |
| NP_001030663.1 | 60S ribosomal protein L4 1                                           | 941.55 |     | 0.507 | 0.04 |
| NP_188267.1    | jacalin like lectin domain containing protein                        | 583.76 |     | 0.454 | 0.03 |
| NP_187537.1    | beta glucosidase 23                                                  | 5800.5 |     | 0.440 | 0.01 |
| NP_197294.1    | 5 methyltetrahydropteroyltriglutamate homocysteine methyltransferase | 4085.6 |     | 0.440 | 0.01 |
| NP_974324.2    | jacalin like lectin domain containing protein                        | 583.76 |     | 0.427 | 0.02 |
| NP_173459.1    | DNA damage resistance protein DRT112                                 | 13375  |     | 0.395 | 0.01 |
| NP_001031175.1 | beta glucosidase 18                                                  | 47.39  |     | 0.395 | 0.03 |
| NP_001031879.1 | isopropylmalate dehydrogenase 1                                      | 1075.5 | Ler |       |      |
| NP_177360.1    | patellin 1                                                           | 687.05 | Ler |       |      |
| NP_567934.1    | LL diaminopimelate aminotransferase                                  | 959.35 | Ler |       |      |
| NP_001190035.1 | Clp ATPase                                                           | 1122.3 | Ler |       |      |
| NP_568437.1    | tubulin beta 8 chain                                                 | 1215.4 | Ler |       |      |
| NP_193130.1    | adenosylhomocysteinase                                               | 8378.1 | Ler |       |      |
| NP_849650.1    | vacuolar calcium binding protein like protein                        | 3076.1 | Ler |       |      |
| NP_566174.1    | 14 3 3 like protein GF14 nu                                          | 6437.8 | Ler |       |      |
| NP_191008.1    | aspartyl protease family protein                                     | 847.75 | Ler |       |      |
| NP_565265.1    | MLP like protein 329                                                 | 11653  | Ler |       |      |
| NP_001117244.1 | L ascorbate peroxidase 1                                             | 14649  | Ler |       |      |
| NP_173669.1    | patellin 2                                                           | 783.06 | Ler |       |      |
| NP_565164.1    | 60S ribosomal protein L30 2                                          | 1569.8 | Ler |       |      |
| NP_191551.1    | RAB GDP dissociation inhibitor 2                                     | 343    | Ler |       |      |
| NP_001189970.1 | 60S ribosomal protein L5 1                                           | 1405.3 | Ler |       |      |
| NP_001189805.1 | 60S ribosomal protein L23                                            | 2467.3 | Ler |       |      |
| NP_001190733.1 | O acetylserine thiol lyase OAS TL isoform A1                         | 2000.7 | Ler |       |      |
| NP_001118458.1 | S adenosylmethionine synthase 3                                      | 1997.4 | Ler |       |      |
